# Supplementary material for: Transcriptional profiles of Arabidopsis stomataless mutants reveal developmental and physiological features of life in the absence of stomata
Source: Front Plant Sci. 2015 Jun 23;6:456. doi: 10.3389/fpls.2015.00456 (PMC4477074; doi:10.3389/fpls.2015.00456)
Supplement: Supplementary file 3 [file Table3.XLSX]

## Sheet: Hoja 1
Table ST3. LIMMA analysis of genes differentially expressed in spch-3 and mute-3 as compared to Col-0.
spch-3 vs Col-0					mute-3 vs Col-0
Probeset	AGI code	p-value (FDR-adjusted)	Fold Change		Probeset	AGI code	p-value (FDR-adjusted)	Fold Change
256497_at	At1g31580	0.00024147	-63.02		259766_at	At1g64360	0.00010572	-31.82
259766_at	At1g64360	3.597e-05	-47.75		246860_at	At5g25840	4.606e-05	-28.6
251181_at	At3g62820	2.34e-05	-30.91		251181_at	At3g62820	8.432e-05	-26.45
246860_at	At5g25840	2.227e-05	-30.49		256008_s_at	At1g34040 At1g34060	8.432e-05	-16.81
261221_at	At1g19960	2.696e-05	-25.65		259842_at	At1g73600 At1g73602	0.00276436	-16.48
260012_at	At1g67865	6.174e-05	-23.25		261221_at	At1g19960	0.00053202	-15.99
259842_at	At1g73600 At1g73602	0.00091244	-20.52		261981_at	At1g33811	8.432e-05	-12.9
247760_at	At5g59130	0.000101	-17.6		266319_s_at	At2g46720 At3g10280	0.00044389	-11.51
249867_at	At5g23020	0.00083077	-17.13		267089_at	At2g38300	8.432e-05	-11.31
256766_at	At3g22231	0.00200576	-16.47		249867_at	At5g23020	0.00030583	-10.91
256008_s_at	At1g34040 At1g34060	3.437e-05	-16.4		257890_s_at	At3g17070 At3g42570	8.432e-05	-10.86
245265_at	At4g14400	8.639e-05	-14.74		254697_at	At4g17970	0.00037857	-10.14
259765_at	At1g64370	2.237e-05	-14.06		260546_at	At2g43520	0.00019885	-9.11
261981_at	At1g33811	2.227e-05	-13.54		245627_at	At1g56600	0.00883826	-9
254234_at	At4g23680	0.00015338	-13.39		245015_at	AtCg00490	0.00140353	-8.98
257365_x_at	At2g26020	0.00198916	-13.11		248684_at	At5g48485	8.432e-05	-8.61
245627_at	At1g56600	0.00220771	-13		245193_at	At1g67810	0.00252646	-8.29
259561_at	At1g21250	0.00054751	-12.76		264953_at	At1g77120	0.0013456	-8.08
247324_at	At5g64190	2.34e-05	-12.53		245016_at	AtCg00500	0.0240796	-7.91
265611_at	At2g25510	0.00038809	-11.95		263210_at	At1g10585	0.0419922	-7.78
251221_at	At3g62550	0.00038322	-11.91		252269_at	At3g49580	0.00151762	-7.74
246310_at	At3g51895	0.00057876	-11.64		246310_at	At3g51895	0.00182257	-7.27
259632_at	At1g56430	0.00172421	-11.4		248676_at	At5g48850	0.0499356	-7.24
262304_at	At1g70890	0.00031494	-10.96		256497_at	At1g31580	0.0128008	-7
254697_at	At4g17970	6.673e-05	-10.85		259403_at	At1g17745	0.00526842	-6.96
266319_s_at	At2g46720 At3g10280	0.00013508	-10.77		245616_at	At4g14480	0.00030583	-6.69
267089_at	At2g38300	2.227e-05	-10.66		257365_x_at	At2g26020	0.0150881	-6.64
257890_s_at	At3g17070 At3g42570	3.437e-05	-9.7		247814_at	At5g58310	0.00573102	-6.55
260546_at	At2g43520	6.436e-05	-9.51		249134_at	At5g43150	0.00030583	-6.52
246142_at	At5g19970	3.562e-05	-9.46		250832_at	At5g04950	0.00177039	-6.52
252011_at	At3g52720	2.34e-05	-9.46		254234_at	At4g23680	0.0012839	-6.43
265121_at	At1g62560	0.00054813	-9.38		259561_at	At1g21250	0.0203651	-6.24
252502_at	At3g46900	0.00013798	-9.34		245265_at	At4g14400	0.00665884	-6.22
247814_at	At5g58310	0.00120408	-9.29		252502_at	At3g46900	0.00118237	-6.19
261913_at	At1g65860	9.681e-05	-9.16		259854_at	At1g72200	0.00112187	-6.19
264573_at	At1g05310	2.696e-05	-9.04		266996_at	At2g34490	0.00457188	-6.19
259403_at	At1g17745	0.00633469	-8.64		267389_at	At2g44460	0.00384212	-6.18
259854_at	At1g72200	0.00030816	-8.54		244996_at	AtCg00160	0.0413751	-6.16
252168_at	At3g50440	0.000101	-8.4		251039_at	At5g02020	0.00451621	-6.04
248684_at	At5g48485	2.34e-05	-8.2		245007_at	AtCg00350	0.0314354	-6.01
266996_at	At2g34490	0.00064285	-8.13		251906_at	At3g53720	8.537e-05	-5.99
255127_at	At4g08300	2.34e-05	-8.1		257247_at	At3g24140	0.00037948	-5.97
250832_at	At5g04950	0.00013587	-8.09		245024_at	AtCg00120	0.0370459	-5.96
246481_s_at	At5g15960 At5g15970	0.00168256	-8		256454_at	At1g75280	0.00143757	-5.92
249052_at	At5g44420	0.00394753	-7.96		249052_at	At5g44420	0.0233255	-5.85
264953_at	At1g77120	0.00070305	-7.96		264573_at	At1g05310	8.432e-05	-5.84
260007_at	At1g67870	0.00010735	-7.89		262482_at	At1g17020	0.00288837	-5.82
259535_at	At1g12280	2.696e-05	-7.79		245353_at	At4g16000	0.00210955	-5.71
258956_at	At3g01440	0.00188906	-7.61		247324_at	At5g64190	0.00073579	-5.7
251039_at	At5g02020	0.00106684	-7.58		247573_at	At5g61160	0.0146615	-5.64
255860_at	At5g34940	0.00033224	-7.41		248528_at	At5g50760	0.00702613	-5.58
255786_at	At1g19670	0.00064285	-7.33		252989_at	At4g38420	0.0179004	-5.56
264782_at	At1g08810	9.898e-05	-7.28		256299_at	At1g69530	0.0016376	-5.56
245736_at	At1g73330	0.0111108	-7.06		246522_at	At5g15830	0.00155032	-5.5
259383_at	At3g16470	0.00371277	-7.05		245018_at	AtCg00520	0.0454262	-5.47
248888_at	At5g46240	0.00014848	-6.88		257021_at	At3g19710	8.432e-05	-5.42
254564_at	At4g19170	0.00055196	-6.86		261242_at	At1g32960	0.0240777	-5.41
254687_at	At4g13770	0.00011264	-6.86		247760_at	At5g59130	0.00432674	-5.37
260221_at	At1g74670	0.0009729	-6.73		252234_at	At3g49780	0.00039012	-5.35
245616_at	At4g14480	4.777e-05	-6.72		263182_at	At1g05575	0.00253812	-5.35
266357_at	At2g32290	0.00079792	-6.68		259445_at	At1g02400	0.0448302	-5.31
256299_at	At1g69530	0.00023554	-6.63		261913_at	At1g65860	0.00071465	-5.31
266752_at	At2g47000	0.00284017	-6.62		259765_at	At1g64370	0.00030583	-5.3
264270_at	At1g60260	0.00136122	-6.6		259632_at	At1g56430	0.0172457	-5.25
252269_at	At3g49580	0.00082512	-6.52		264195_at	At1g22690	0.00039012	-5.2
248330_at	At5g52810	0.0007459	-6.5		255860_at	At5g34940	0.00112187	-5.18
247549_at	At5g61420	0.00083589	-6.45		245011_at	AtCg00430	0.0330767	-5.15
245891_at	At5g09220	0.00014169	-6.44		245734_at	At1g73480	0.00672479	-5.14
245015_at	AtCg00490	5.125e-05	-6.38		257645_at	At3g25790	0.0005106	-5.12
256617_at	At3g22240	0.00270516	-6.38		265025_at	At1g24575	0.00151762	-5.11
257021_at	At3g19710	0.0001335	-6.27		264958_at	At1g76960	0.0173663	-5.08
246522_at	At5g15830	0.0001289	-6.11		245711_at	At5g04340	0.00443869	-5.07
260745_at	At1g78370	0.0005758	-6.08		247949_at	At5g57220	0.0429024	-5.03
249134_at	At5g43150	0.00015565	-5.98		248888_at	At5g46240	0.00042942	-4.97
265221_s_at	At2g02000 At2g02010	0.0140399	-5.96		247754_at	At5g59080	0.00106051	-4.95
251906_at	At3g53720	3.883e-05	-5.93		246777_at	At5g27420	0.0228464	-4.88
252983_at	At4g37980	0.0001289	-5.93		246142_at	At5g19970	0.00042942	-4.87
257247_at	At3g24140	0.00014848	-5.93		257824_at	At3g25290	0.00107465	-4.86
261046_at	At1g01390	0.00046158	-5.82		255127_at	At4g08300	0.00469837	-4.85
247435_at	At5g62480	0.0101127	-5.76		256617_at	At3g22240	0.0357991	-4.85
265025_at	At1g24575	0.0001096	-5.62		265221_s_at	At2g02000 At2g02010	0.0267396	-4.83
265197_at	At2g36750	0.0149494	-5.61		266600_at	At2g46070	0.00042942	-4.81
267644_s_at	At2g32870 At2g32880	2.227e-05	-5.61		245009_at	AtCg00380	0.0247696	-4.8
248007_at	At5g56260	2.34e-05	-5.6		260012_at	At1g67865	0.00191857	-4.8
254791_at	At4g12910	0.00101569	-5.6		255786_at	At1g19670	0.00319112	-4.78
262883_at	At1g64780	0.00059771	-5.58		257206_at	At3g16530	0.0236353	-4.78
247074_at	At5g66590	0.00100269	-5.55		262232_at	At1g68600	0.00353604	-4.78
253545_at	At4g31310	0.00018182	-5.51		260783_at	At1g06160	0.00248009	-4.74
260831_at	At1g06830	0.00523805	-5.48		253046_at	At4g37370	0.0194378	-4.72
251028_at	At5g02230	0.00017581	-5.46		245946_at	At5g19580	0.00154821	-4.67
262875_at	At1g64970	0.00023801	-5.46		266368_at	At2g41380	0.0102666	-4.66
252234_at	At3g49780	0.00021289	-5.44		245736_at	At1g73330	0.0419021	-4.65
265547_at	At2g28305	0.0001289	-5.44		246293_at	At3g56710	0.00828932	-4.62
245353_at	At4g16000	0.00105009	-5.41		259535_at	At1g12280	0.00049912	-4.6
261459_at	At1g21100	0.00624563	-5.36		258606_at	At3g02840	0.0214931	-4.57
263951_at	At2g35960	0.00463135	-5.36		265725_at	At2g32030	0.0213952	-4.57
256589_at	At3g28740	0.012687	-5.33		259618_at	At1g48000	0.00257152	-4.54
264958_at	At1g76960	0.00950412	-5.31		258983_at	At3g08860	0.014808	-4.51
266362_at	At2g32430	8.204e-05	-5.31		266362_at	At2g32430	0.00041055	-4.47
258851_at	At3g03190	0.00015338	-5.27		254318_at	At4g22530	0.00722109	-4.45
261309_at	At1g48598 At1g48600	0.0004092	-5.24		248330_at	At5g52810	0.00264438	-4.4
262312_at	At1g70830	0.0145743	-5.22		260126_at	At1g36370	0.010432	-4.39
266395_at	At2g43100	0.00014848	-5.11		266800_at	At2g22880	0.0304455	-4.39
256788_at	At3g13730	4.959e-05	-5.09		252011_at	At3g52720	0.00069089	-4.36
267389_at	At2g44460	0.00138905	-5.03		257641_s_at	At3g25760 At3g25770	0.00197836	-4.35
262259_s_at	At1g53870 At1g53890	0.00015338	-5.01		244972_at	AtCg00680	0.0155588	-4.33
259789_at	At1g29395	0.0176642	-4.98		244997_at	AtCg00170	0.0382639	-4.33
245007_at	AtCg00350	0.0196045	-4.97		262680_at	At1g75880	0.00151762	-4.3
249932_at	At5g22390	0.00078402	-4.97		261335_at	At1g44800	0.00742048	-4.29
254386_at	At4g21960	0.00421253	-4.94		265197_at	At2g36750	0.0277386	-4.28
262232_at	At1g68600	0.00131589	-4.94		261545_at	At1g63530	0.00630049	-4.27
262830_at	At1g14700	0.00042581	-4.93		266267_at	At2g29460	0.00795445	-4.25
253411_at	At4g32980	0.00126962	-4.92		261648_at	At1g27730	0.016346	-4.24
257824_at	At3g25290	0.00034406	-4.92		245025_at	AtCg00130	0.0394476	-4.22
245193_at	At1g67810	0.0249007	-4.89		248132_at	At5g54840	0.00046771	-4.2
261881_at	At1g80760	0.00022239	-4.85		264998_at	At1g67330	0.00095845	-4.18
251713_at	At3g56080	0.0008419	-4.84		262312_at	At1g70830	0.0399632	-4.17
263184_at	At1g05560	0.00849981	-4.83		255302_at	At4g04830	0.00566227	-4.14
254163_s_at	At4g24340 At4g24350	0.0005779	-4.8		256589_at	At3g28740	0.028977	-4.13
251987_at	At3g53280	4.755e-05	-4.79		260007_at	At1g67870	0.00095845	-4.11
251360_at	At3g61210	6.174e-05	-4.77		261459_at	At1g21100	0.00520117	-4.11
250598_at	At5g07690	0.00121244	-4.74		259479_at	At1g19020	0.039624	-4.05
254150_at	At4g24350	0.00156315	-4.72		254500_at	At4g20110	0.00953767	-4.03
260179_at	At1g70690	7.453e-05	-4.67		246584_at	At5g14730	0.00341207	-4.02
244972_at	AtCg00680	0.00075507	-4.63		261892_at	At1g80840	0.039409	-4.02
265305_at	At2g20340	0.00434893	-4.62		250598_at	At5g07690	0.00488073	-4.01
247573_at	At5g61160	0.0104996	-4.6		258791_at	At3g04720	0.00072631	-4.01
251503_at	At3g59140	0.00125856	-4.6		249932_at	At5g22390	0.00041537	-3.97
260706_at	At1g32350	0.0324219	-4.6		260745_at	At1g78370	0.0035486	-3.96
255259_at	At4g05020	0.00420654	-4.59		262883_at	At1g64780	0.00662612	-3.96
246293_at	At3g56710	0.00402185	-4.58		248040_at	At5g55970	0.00207558	-3.89
265698_at	At2g32160	0.00073123	-4.57		248970_at	At5g45380	0.00159319	-3.88
267080_at	At2g41190	0.00463338	-4.57		260005_at	At1g67920	0.00044389	-3.87
261335_at	At1g44800	0.00532042	-4.56		263231_at	At1g05680	0.0341796	-3.86
251785_at	At3g55130	0.00034169	-4.55		265121_at	At1g62560	0.00603829	-3.86
264195_at	At1g22690	0.00023899	-4.55		251503_at	At3g59140	0.00344586	-3.85
251916_at	At3g53960	7.23e-05	-4.5		267028_at	At2g38470	0.0156368	-3.82
254225_at	At4g23670	0.00246547	-4.5		250670_at	At5g06860	0.0283425	-3.81
258037_at	At3g21230	0.000505	-4.48		266395_at	At2g43100	0.00067625	-3.78
263126_at	At1g78460	0.00375024	-4.48		264217_at	At1g60190	0.0164729	-3.77
246880_s_at	At5g25980 At5g26000	0.00099633	-4.47		252400_at	At3g48020	0.00154821	-3.76
254232_at	At4g23600	0.0111783	-4.47		254926_at	At4g11280	0.016701	-3.76
256169_at	At1g51800	0.042605	-4.45		263126_at	At1g78460	0.0104618	-3.74
259996_at	At1g67910	0.0017324	-4.45		260179_at	At1g70690	0.00076295	-3.73
260783_at	At1g06160	0.00065377	-4.44		260522_x_at	At2g41730	0.00690385	-3.71
267084_at	At2g41180	0.0008419	-4.42		259383_at	At3g16470	0.0364453	-3.68
249188_at	At5g42830	0.0215613	-4.41		262373_at	At1g73120	0.00365567	-3.67
256441_at	At3g10940	0.00532042	-4.41		258851_at	At3g03190	0.00138234	-3.66
258807_at	At3g04030	0.00035604	-4.41		263776_s_at	At2g46430 At2g46440	0.00071465	-3.66
252870_at	At4g39940	0.00049318	-4.4		248327_at	At5g52750	0.00665884	-3.65
248969_at	At5g45310	0.00011917	-4.33		255259_at	At4g05020	0.00923413	-3.64
246464_at	At5g16980	0.00134128	-4.32		253277_at	At4g34230	0.00908731	-3.63
249208_at	At5g42650	0.00144118	-4.31		248434_at	At5g51440	0.0152314	-3.6
265892_at	At2g15020	5.195e-05	-4.28		264270_at	At1g60260	0.0120843	-3.6
245946_at	At5g19580	0.000505	-4.27		250109_at	At5g15230	0.00041537	-3.57
260005_at	At1g67920	0.00022363	-4.27		259211_at	At3g09020	0.00315496	-3.55
250268_s_at	At5g12950 At5g12960	0.00163867	-4.26		245003_at	AtCg00280	0.0217854	-3.53
262680_at	At1g75880	0.00098602	-4.26		249942_at	At5g22300	0.0409861	-3.53
264052_at	At2g22330	0.00014848	-4.24		262244_at	At1g48260	0.00124012	-3.52
252412_at	At3g47295	0.00136122	-4.21		244962_at	AtCg01050	0.0403189	-3.51
267076_at	At2g41090	0.00830064	-4.17		260840_at	At1g29050	0.031518	-3.51
248169_at	At5g54610	0.0008419	-4.16		261350_at	At1g79770	0.00103887	-3.51
256527_at	At1g66100	0.011717	-4.16		253203_at	At4g34710	0.00736986	-3.5
264998_at	At1g67330	0.00015338	-4.15		254687_at	At4g13770	0.00155032	-3.47
259705_at	At1g77450	0.00259174	-4.14		261456_at	At1g21050	0.00233086	-3.45
265699_at	At2g03550	0.00022214	-4.14		244932_at	AtCg01060	0.0414495	-3.43
257650_at	At3g16800	0.00136842	-4.12		262113_at	At1g02820	0.00422031	-3.43
245016_at	AtCg00500	0.0438277	-4.11		262646_at	At1g62800	0.00466055	-3.43
260664_at	At1g19510	0.00026831	-4.11		263829_at	At2g40435	0.00369569	-3.43
260041_at	At1g68780	0.00142741	-4.1		263565_at	At2g15390	0.0284512	-3.42
266600_at	At2g46070	0.00028968	-4.09		259661_at	At1g55265	0.0157013	-3.4
263776_s_at	At2g46430 At2g46440	0.00035355	-4.06		251291_at	At3g61900	0.00234329	-3.39
255626_at	At4g00780	0.00010389	-4.05		261927_at	At1g22500	0.00264079	-3.39
256503_at	At1g75250	0.00069037	-4.04		258757_at	At3g10910 At3g10912	0.00376032	-3.38
248970_at	At5g45380	0.00049318	-4.03		265067_at	At1g03850	0.0224301	-3.38
249472_at	At5g39210	0.00565379	-4		251400_at	At3g60420	0.0231937	-3.37
264638_at	At1g65480	0.000101	-4		254665_at	At4g18340	0.0289932	-3.37
265200_s_at	At2g36790 At2g36800	0.00742264	-4		262304_at	At1g70890	0.01251	-3.37
265059_at	At1g52080	0.00068659	-3.99		265471_at	At2g37130	0.00655985	-3.37
253243_at	At4g34560	0.00442967	-3.98		251457_s_at	At3g60160 At3g60970	0.00154821	-3.35
266824_at	At2g22800	0.00043941	-3.98		261826_at	At1g11580	0.00103887	-3.33
260541_at	At2g43530	0.0101127	-3.96		245010_at	AtCg00420	0.0234898	-3.32
263915_at	At2g36430	0.00042581	-3.96		264635_at	At1g65500	0.0392174	-3.29
249866_at	At5g23010	0.00010735	-3.95		246880_s_at	At5g25980 At5g26000	0.00046771	-3.28
251358_at	At3g61160	0.00034406	-3.95		259841_at	At1g52200	0.0186065	-3.28
250517_at	At5g08260	0.0005343	-3.93		245019_at	AtCg00530	0.0482682	-3.27
253277_at	At4g34230	0.00197863	-3.93		249208_at	At5g42650	0.00743906	-3.25
259373_at	At1g69160	5.321e-05	-3.93		261046_at	At1g01390	0.00536281	-3.25
249047_at	At5g44410	0.00563575	-3.92		247095_at	At5g66400	0.001306	-3.24
260840_at	At1g29050	0.00771124	-3.92		259381_s_at	At3g16390 At3g16400 At3g16410	0.0337235	-3.24
264217_at	At1g60190	0.00552261	-3.92		245020_at	AtCg00540	0.0416931	-3.23
259381_s_at	At3g16390 At3g16400 At3g16410	0.0167072	-3.91		248169_at	At5g54610	0.00605028	-3.23
265962_at	At2g37460	0.00170947	-3.91		258787_at	At3g11840	0.0121689	-3.23
256454_at	At1g75280	0.00014848	-3.89		265200_s_at	At2g36790 At2g36800	0.00553091	-3.23
261350_at	At1g79770	0.00042706	-3.83		260004_at	At1g67860	0.00526842	-3.22
255773_at	At1g18590	0.00014119	-3.8		251785_at	At3g55130	0.00149851	-3.2
266707_at	At2g03310	0.00312631	-3.8		250517_at	At5g08260	0.00071465	-3.19
250471_at	At5g10170	0.00032554	-3.78		252040_at	At3g52060	0.00069135	-3.19
264314_at	At1g70420	0.0011347	-3.78		263405_s_at	At2g04066 At2g04080	0.00071465	-3.18
261927_at	At1g22500	0.00016887	-3.76		262374_s_at	At1g72910 At1g72930	0.00348496	-3.17
261084_at	At1g07440	0.00174371	-3.75		263788_at	At2g24580	0.0175135	-3.16
262244_at	At1g48260	0.00032519	-3.75		246018_at	At5g10695	0.0287931	-3.15
262314_at	At1g70810	0.00016887	-3.75		252487_at	At3g46660	0.023048	-3.15
262373_at	At1g73120	0.00469502	-3.75		255795_at	At2g33380	0.00719238	-3.15
259417_at	At1g02340	0.00031392	-3.73		265962_at	At2g37460	0.00069089	-3.15
264346_at	At1g12010	0.00145268	-3.73		260633_at	At1g62400	0.00046771	-3.14
254256_at	At4g23180	0.00479589	-3.72		262314_at	At1g70810	0.00081396	-3.14
255795_at	At2g33380	0.00103151	-3.72		265668_at	At2g32020	0.0463329	-3.14
260633_at	At1g62400	0.000101	-3.72		261309_at	At1g48598 At1g48600	0.0104031	-3.13
267175_s_at	At2g37620 At3g53750	0.003675	-3.72		265305_at	At2g20340	0.0260028	-3.13
257175_s_at	At3g23470 At3g23480	0.00014848	-3.7		266464_at	At2g47800	0.00197836	-3.11
262811_at	At1g11700	0.00488833	-3.7		248763_at	At5g47550	0.00124012	-3.1
263182_at	At1g05575	0.0340757	-3.7		259213_at	At3g09010	0.00953767	-3.1
261598_at	At1g49750	0.0024375	-3.69		249532_at	At5g38780	0.00358875	-3.09
247600_at	At5g60890	0.00355994	-3.68		262072_at	At1g59590	0.00655221	-3.09
260004_at	At1g67860	0.00041397	-3.68		261247_at	At1g20070	0.0313559	-3.07
262098_at	At1g56170	0.00088081	-3.68		264929_at	At1g60730	0.0162056	-3.07
254305_at	At4g22200	0.00014848	-3.67		247072_at	At5g66490	0.00071465	-3.06
257543_at	At3g28960	0.00030929	-3.67		265698_at	At2g32160	0.00456535	-3.05
259211_at	At3g09020	0.00173484	-3.67		246125_at	At5g19875	0.00365567	-3.04
248040_at	At5g55970	0.00018697	-3.66		253525_at	At4g31330	0.00519049	-3.04
257300_at	At3g28080	0.00072333	-3.66		254663_at	At4g18290	0.00163798	-3.04
260060_at	At1g73680	0.00042581	-3.65		255230_at	At4g05390	0.00904385	-3.04
264635_at	At1g65500	0.0161287	-3.65		263931_at	At2g36220	0.014619	-3.04
248676_at	At5g48850	0.0422434	-3.64		263951_at	At2g35960	0.0252778	-3.04
253657_at	At4g30110	0.00100629	-3.64		265499_at	At2g15480	0.0219241	-3.04
262717_s_at	At1g16400 At1g16410	0.00134128	-3.64		251013_at	At5g02540	0.00402417	-3.03
245011_at	AtCg00430	0.0426893	-3.63		245393_at	At4g16260	0.0199786	-3.01
245734_at	At1g73480	0.00788811	-3.63		252168_at	At3g50440	0.0137395	-3.01
256914_at	At3g23880	0.00369587	-3.62		257543_at	At3g28960	0.00103887	-3.01
264859_at	At1g24280	0.00333998	-3.62		249136_at	At5g43180	0.0211818	-3
254870_at	At4g11900	0.00112613	-3.61		266290_at	At2g29490	0.0246986	-3
247444_at	At5g62630	0.00040537	-3.6		255462_at	At4g02940	0.00197836	-2.99
260002_at	At1g67940	8.194e-05	-3.6		259705_at	At1g77450	0.00450071	-2.99
262646_at	At1g62800	0.00189617	-3.59		259297_at	At3g05360	0.00459254	-2.98
266327_at	At2g46680	0.00156315	-3.59		245912_at	At5g19600	0.0384305	-2.97
262113_at	At1g02820	0.00025022	-3.58		250828_at	At5g05250	0.00980478	-2.97
264986_at	At1g27130	0.00022363	-3.58		258037_at	At3g21230	0.00334306	-2.95
247072_at	At5g66490	6.673e-05	-3.56		256469_at	At1g32540	0.00298049	-2.92
263829_at	At2g40435	0.00154285	-3.56		256503_at	At1g75250	0.00880537	-2.92
255645_at	At4g00880	0.00982812	-3.55		251304_at	At3g61990	0.00090972	-2.9
248434_at	At5g51440	0.0209963	-3.53		262811_at	At1g11700	0.0181077	-2.9
261545_at	At1g63530	0.00542974	-3.52		267084_at	At2g41180	0.00655221	-2.89
262072_at	At1g59590	0.00120112	-3.52		260754_at	At1g49000	0.00722292	-2.88
252973_s_at	At4g38740	0.00031287	-3.5		264301_at	At1g78780	0.00151674	-2.87
258977_s_at	At3g02020 At5g14060	0.00021847	-3.5		258059_at	At3g29035	0.0019721	-2.86
265428_at	At2g20720	0.0265534	-3.5		267644_s_at	At2g32870 At2g32880	0.00095845	-2.86
254862_at	At4g12030	0.00162415	-3.48		253657_at	At4g30110	0.00230966	-2.84
247754_at	At5g59080	0.000101	-3.47		258935_at	At3g10120	0.00794008	-2.83
262612_at	At1g14150	0.00352146	-3.43		253382_at	At4g33040	0.0237654	-2.82
251169_at	At3g63210	0.00026138	-3.42		255802_s_at	At4g10150 At4g10160	0.00112187	-2.81
260385_at	At1g74090	0.00044069	-3.42		262098_at	At1g56170	0.00978901	-2.81
262482_at	At1g17020	0.00888751	-3.42		246216_at	At4g36380	0.00742669	-2.78
245692_at	At5g04150	0.0219192	-3.41		249377_at	At5g40690	0.0162994	-2.78
255129_at	At4g08290	0.00015338	-3.41		264638_at	At1g65480	0.00358875	-2.78
255578_at	At4g01450	0.00042894	-3.41		254328_at	At4g22570	0.00832564	-2.77
265902_at	At2g25590	0.00018387	-3.4		254289_at	At4g22980	0.0116239	-2.76
248132_at	At5g54840	0.00112184	-3.39		256376_s_at	At1g66690 At1g66700	0.044582	-2.76
252334_at	At3g48850	0.0411443	-3.39		254430_at	At4g20820	0.00466287	-2.74
255104_at	At4g08685	0.0210291	-3.39		246996_at	At5g67420	0.0142792	-2.73
248467_at	At5g50800	0.00531358	-3.38		262357_at	At1g73040	0.00210955	-2.72
255802_s_at	At4g10150 At4g10160	0.00010735	-3.38		264314_at	At1g70420	0.0042641	-2.72
258791_at	At3g04720	0.00144093	-3.38		245731_at	At1g73500	0.00112187	-2.71
255877_at	At2g40460	0.00390978	-3.36		245891_at	At5g09220	0.00138234	-2.71
266291_at	At2g29320	0.00064285	-3.36		264746_at	At1g62300	0.0338516	-2.71
267112_at	At2g14750	0.00034633	-3.35		245277_at	At4g15550	0.0283042	-2.7
253382_at	At4g33040	0.008557	-3.34		249918_at	At5g19240	0.00235675	-2.7
254328_at	At4g22570	0.00145763	-3.34		259996_at	At1g67910	0.0166756	-2.7
262137_at	At1g77920	0.00306004	-3.34		261425_at	At1g18880	0.00071465	-2.7
247252_at	At5g64770	0.0182286	-3.33		250471_at	At5g10170	0.00069701	-2.69
250633_at	At5g07460	0.00116537	-3.33		251169_at	At3g63210	0.00155032	-2.69
257678_at	At3g20420	0.00034772	-3.33		251221_at	At3g62550	0.0449184	-2.69
256293_at	At1g69440	0.00067551	-3.32		262875_at	At1g64970	0.00384756	-2.69
266326_at	At2g46650	0.00072333	-3.32		255904_at	At1g17860	0.0483356	-2.68
258139_at	At3g24520	0.0130853	-3.3		256835_at	At3g22890	0.013745	-2.68
259618_at	At1g48000	0.00194564	-3.3		258275_at	At3g15760	0.00203572	-2.68
261323_at	At1g44760	0.00084244	-3.3		264968_at	At1g67360	0.00562678	-2.68
265837_at	At2g14560	0.00243817	-3.3		255621_at	At4g01390	0.00682929	-2.67
251218_at	At3g62410	0.00098747	-3.29		264987_at	At1g27030	0.0451142	-2.67
252882_at	At4g39675	0.0358083	-3.29		258977_s_at	At3g02020 At5g14060	0.0039729	-2.66
263545_at	At2g21560	0.00079792	-3.28		260327_at	At1g63840	0.00450071	-2.66
248327_at	At5g52750	0.00422936	-3.26		251360_at	At3g61210	0.00129925	-2.65
251457_s_at	At3g60160 At3g60970	0.00073357	-3.26		256294_at	At1g69450	0.00265395	-2.65
257206_at	At3g16530	0.0163794	-3.26		247444_at	At5g62630	0.00149612	-2.64
267612_at	At2g26690	0.00019306	-3.24		256788_at	At3g13730	0.00049912	-2.64
246125_at	At5g19875	0.00073123	-3.23		262259_s_at	At1g53870 At1g53890	0.00256412	-2.64
246701_at	At5g28020	0.00093668	-3.23		264346_at	At1g12010	0.00886046	-2.64
247040_at	At5g67150	0.00381049	-3.22		248467_at	At5g50800	0.0208602	-2.63
248908_at	At5g45800	0.00233011	-3.22		250803_at	At5g04980	0.00203572	-2.63
256596_at	At3g28540	0.00062896	-3.22		253606_at	At4g30530	0.00745679	-2.63
266290_at	At2g29490	0.0466763	-3.19		253654_at	At4g30060	0.02994	-2.62
256664_at	At3g12040	0.00049442	-3.18		254952_at	At4g10955 At4g10960	0.0130671	-2.61
262653_at	At1g14130	0.00277815	-3.18		260602_at	At1g55920	0.00348496	-2.61
258055_at	At3g16250	0.0270253	-3.17		260002_at	At1g67940	0.00067625	-2.6
251400_at	At3g60420	0.0371698	-3.16		260287_at	At1g80440	0.0147085	-2.6
260522_x_at	At2g41730	0.0105134	-3.16		262717_s_at	At1g16400 At1g16410	0.00558936	-2.6
257625_at	At3g26230	0.0350016	-3.15		263374_at	At2g20560	0.0180605	-2.6
259116_at	At3g01350	0.00272413	-3.15		258385_at	At3g15510	0.00813368	-2.59
253606_at	At4g30530	0.00242513	-3.13		262731_at	At1g16420	0.0287853	-2.59
261500_at	At1g28400	0.0430188	-3.13		263151_at	At1g54120	0.0215304	-2.59
258935_at	At3g10120	0.00369587	-3.12		252133_at	At3g50900	0.00512896	-2.58
262517_at	At1g17180	0.0447273	-3.11		255437_at	At4g03060	0.0372087	-2.57
263690_at	At1g26960	0.00021475	-3.11		258299_at	At3g23410	0.00913117	-2.57
260876_at	At1g21460	0.00195962	-3.1		264782_at	At1g08810	0.00423885	-2.57
245276_at	At4g16780	0.00255725	-3.09		265699_at	At2g03550	0.00690287	-2.57
261826_at	At1g11580	0.00054131	-3.09		246620_at	At5g36220	0.00527711	-2.56
249944_at	At5g22290	0.00072294	-3.08		261881_at	At1g80760	0.00422763	-2.56
253268_s_at	At4g34131 At4g34135	0.0175009	-3.08		265075_at	At1g55450	0.0138769	-2.56
254663_at	At4g18290	0.0005914	-3.08		249866_at	At5g23010	0.00105927	-2.55
251304_at	At3g61990	0.00083455	-3.07		265023_at	At1g24440	0.00079897	-2.55
250485_at	At5g09990	0.00011318	-3.06		245008_at	AtCg00360	0.0170143	-2.53
262357_at	At1g73040	0.00020087	-3.06		247283_at	At5g64250	0.0100217	-2.53
266015_at	At2g24190	0.00062896	-3.06		252053_at	At3g52400	0.0497901	-2.53
255028_at	At4g09890	0.00534408	-3.04		259150_at	At3g10320	0.0497901	-2.53
265023_at	At1g24440	0.00017173	-3.03		265199_s_at	At2g36770 At2g36780	0.0443998	-2.53
261819_at	At1g11410	0.00075966	-3.02		249619_at	At5g37500	0.00131944	-2.52
245912_at	At5g19600	0.0150021	-3.01		249911_at	At5g22740	0.00264438	-2.52
251013_at	At5g02540	0.00191838	-3.01		251524_at	At3g58990	0.00602511	-2.52
258300_at	At3g23340	0.00031392	-3.01		262137_at	At1g77920	0.0125682	-2.52
259308_at	At3g05180	0.00044149	-3.01		266327_at	At2g46680	0.0133971	-2.52
256376_s_at	At1g66690 At1g66700	0.0289895	-3		255310_at	At4g04955	0.00650031	-2.51
245047_at	AtCg00020	0.0302306	-2.99		250937_at	At5g03230	0.00513621	-2.49
263151_at	At1g54120	0.000505	-2.99		254571_at	At4g19370	0.00112187	-2.49
250803_at	At5g04980	0.00057451	-2.98		245276_at	At4g16780	0.0121409	-2.48
254759_at	At4g13180	0.00156315	-2.98		253052_at	At4g37310	0.00466055	-2.48
256799_at	At3g18560	0.00488833	-2.98		254386_at	At4g21960	0.0371744	-2.48
260774_at	At1g78290	0.0008419	-2.98		257678_at	At3g20420	0.00469937	-2.48
263714_at	At2g20610	0.00043941	-2.98		245197_at	At1g67800	0.00138234	-2.47
266155_at	266155_at	0.00470218	-2.98		253545_at	At4g31310	0.00124899	-2.47
266267_at	At2g29460	0.035553	-2.98		254694_at	254694_at	0.00200962	-2.47
244937_at	AtCg01110	0.0143869	-2.97		255626_at	At4g00780	0.00180622	-2.47
245025_at	AtCg00130	0.0348188	-2.97		258201_at	At3g13910	0.0135724	-2.47
246159_at	At5g20935	0.00655058	-2.97		261901_at	At1g80920	0.0372301	-2.47
250828_at	At5g05250	0.00585723	-2.97		253125_at	At4g36040	0.0459319	-2.46
255462_at	At4g02940	0.00650135	-2.97		254256_at	At4g23180	0.0157637	-2.46
263486_at	At2g22200	0.0193583	-2.97		261598_at	At1g49750	0.028977	-2.46
248763_at	At5g47550	0.00014848	-2.96		263791_at	At2g24520	0.00154821	-2.46
258757_at	At3g10910 At3g10912	0.00303575	-2.96		246464_at	At5g16980	0.0394476	-2.45
266279_at	At2g29290	0.00020087	-2.95		254862_at	At4g12030	0.0119642	-2.45
250109_at	At5g15230	0.00272413	-2.94		259133_at	At3g05400	0.0256536	-2.45
255243_at	At4g05590	0.0020283	-2.94		266357_at	At2g32290	0.0337648	-2.45
249817_at	At5g23820	0.0255886	-2.92		244937_at	AtCg01110	0.0287528	-2.44
251154_at	At3g63110	0.00012384	-2.92		248719_at	At5g47910	0.00427046	-2.44
252400_at	At3g48020	0.00010735	-2.92		252387_at	At3g47800	0.015343	-2.44
255302_at	At4g04830	0.00048923	-2.92		253243_at	At4g34560	0.0369234	-2.44
257288_at	At3g29670	0.00043941	-2.92		259034_at	At3g09410	0.00818257	-2.44
261425_at	At1g18880	0.00032948	-2.92		246858_at	At5g25930	0.0374241	-2.43
255016_at	At4g10120	0.00020087	-2.91		252859_at	At4g39780	0.00634349	-2.43
256294_at	At1g69450	0.00057313	-2.91		254564_at	At4g19170	0.00894967	-2.43
253249_at	At4g34680	0.00054131	-2.9		256829_at	At3g22850	0.00184358	-2.43
257507_at	At1g29600	0.0237136	-2.9		265837_at	At2g14560	0.0490022	-2.43
249288_at	At5g41050	0.00132745	-2.88		247287_at	At5g64230	0.0334841	-2.42
248021_at	At5g56500	0.00024855	-2.87		267112_at	At2g14750	0.00206639	-2.42
254318_at	At4g22530	0.0204244	-2.86		247074_at	At5g66590	0.023402	-2.41
253203_at	At4g34710	0.0436638	-2.85		257074_at	At3g19660	0.040342	-2.41
264204_at	At1g22710	0.00239686	-2.85		258063_at	At3g14620	0.00298989	-2.41
254571_at	At4g19370	0.00071239	-2.84		262518_at	At1g17170	0.00521667	-2.41
258264_at	At3g15790	0.00221542	-2.84		245014_at	AtCg00480	0.036666	-2.4
245277_at	At4g15550	0.00640933	-2.83		258038_at	At3g21260	0.0133971	-2.4
245393_at	At4g16260	0.0155337	-2.82		261084_at	At1g07440	0.0133393	-2.4
258059_at	At3g29035	0.00052104	-2.82		247109_at	At5g65870	0.0275934	-2.39
258063_at	At3g14620	0.00083523	-2.82		252973_s_at	At4g38740	0.00500978	-2.39
260199_at	At1g67590	0.00202344	-2.82		255923_at	At1g22180	0.00164185	-2.39
262213_at	At1g74870	0.0257431	-2.82		261315_at	At1g53170	0.00652508	-2.39
263515_at	At2g21640	0.020722	-2.82		264012_at	At2g21080	0.00184358	-2.39
246584_at	At5g14730	0.0289449	-2.81		249025_at	At5g44720	0.00124012	-2.38
252363_at	At3g48460	0.00204076	-2.81		252618_at	At3g45140	0.0287618	-2.38
254500_at	At4g20110	0.0146005	-2.81		254759_at	At4g13180	0.00439987	-2.38
266285_at	At2g29180	0.00246138	-2.81		266824_at	At2g22800	0.00956422	-2.38
267359_at	At2g40020	0.00420782	-2.81		245254_at	At4g14680	0.00348496	-2.37
247035_at	At5g67110	0.00551253	-2.8		250781_at	At5g05410	0.0259158	-2.37
254630_at	At4g18360	0.0326078	-2.8		251713_at	At3g56080	0.0180943	-2.37
261375_at	At1g53160	0.0192995	-2.8		260855_at	At1g21920	0.0194847	-2.37
250734_at	At5g06270	0.0132705	-2.79		267538_at	At2g41870	0.00257354	-2.37
265499_at	At2g15480	0.0406053	-2.79		247040_at	At5g67150	0.0152909	-2.36
252572_at	At3g45290	0.00149325	-2.77		251916_at	At3g53960	0.00149226	-2.36
253534_at	At4g31500	0.0113443	-2.77		264866_at	At1g24140	0.0443998	-2.36
253971_at	At4g26530	0.0138549	-2.77		247035_at	At5g67110	0.0180943	-2.35
254665_at	At4g18340	0.0432748	-2.77		247549_at	At5g61420	0.0376233	-2.35
259340_at	At3g03870	0.00203395	-2.77		254331_s_at	At4g22690 At4g22710	0.00185108	-2.35
260754_at	At1g49000	0.00306004	-2.77		264348_at	At1g12110	0.00589709	-2.34
245254_at	At4g14680	0.00191905	-2.76		264894_at	At1g23040	0.00513621	-2.34
249482_at	At5g38980	0.00205455	-2.76		250408_at	At5g10930	0.0162994	-2.33
254153_at	At4g24450	0.00026741	-2.76		251301_at	At3g61880	0.0334618	-2.33
263111_s_at	At1g65190 At1g65250	0.00186586	-2.76		253911_at	At4g27300	0.00294102	-2.33
258537_at	At3g04210	0.0026284	-2.75		265170_at	At1g23730	0.0352854	-2.33
267264_at	At2g22970	0.0095199	-2.75		249486_at	At5g39030	0.00276436	-2.32
253218_at	At4g34980	0.00742264	-2.74		253268_s_at	At4g34131 At4g34135	0.0240513	-2.32
262374_s_at	At1g72910 At1g72930	0.00063036	-2.74		254305_at	At4g22200	0.00684956	-2.32
264738_at	At1g62250	0.00049318	-2.73		266259_at	At2g27830	0.0114907	-2.32
254926_at	At4g11280	0.00759282	-2.72		253263_at	At4g34000	0.00250737	-2.31
251524_at	At3g58990	0.00361985	-2.71		257194_at	At3g13110	0.00224636	-2.31
263452_at	At2g22190	0.0264333	-2.71		260567_at	At2g43820	0.00206246	-2.31
259661_at	At1g55265	0.0177016	-2.7		263184_at	At1g05560	0.0284855	-2.31
262396_at	At1g49470	0.00145014	-2.7		265411_at	At2g16630	0.00602576	-2.31
249025_at	At5g44720	0.00022363	-2.69		250633_at	At5g07460	0.00702613	-2.3
258038_at	At3g21260	0.00430593	-2.69		253228_at	At4g34630	0.00151762	-2.3
260602_at	At1g55920	0.0165753	-2.69		248381_at	At5g51830	0.0308947	-2.29
264096_at	At1g78995	0.00311471	-2.69		252870_at	At4g39940	0.00301163	-2.29
245748_at	At1g51140	0.0161287	-2.68		255502_at	At4g02410	0.00300369	-2.29
253654_at	At4g30060	0.0210411	-2.68		260635_at	At1g62422	0.00372449	-2.29
257641_s_at	At3g25760 At3g25770	0.0358388	-2.68		256674_at	At3g52360	0.00545144	-2.28
263791_at	At2g24520	0.00034169	-2.68		257300_at	At3g28080	0.00666586	-2.28
253263_at	At4g34000	0.00083523	-2.66		265245_at	At2g43060	0.00382504	-2.28
255621_at	At4g01390	0.00432997	-2.66		248322_at	At5g52760	0.00611029	-2.27
258607_at	At3g02730	0.00337229	-2.66		256453_at	At1g75270	0.00789671	-2.27
266413_at	At2g38740	0.00038784	-2.66		256922_at	At3g19010	0.0387926	-2.27
261247_at	At1g20070	0.011704	-2.65		246108_at	At5g28630	0.0111644	-2.26
265993_at	At2g24160	0.00145794	-2.65		249527_at	At5g38710	0.00690385	-2.26
258140_at	At3g24503	0.00092702	-2.64		254573_at	At4g19420	0.015924	-2.26
249010_at	At5g44580	0.00241048	-2.63		255773_at	At1g18590	0.00173776	-2.26
251759_at	At3g55630	0.00066263	-2.63		257147_at	At3g27270	0.0042799	-2.26
258787_at	At3g11840	0.016522	-2.63		262134_at	At1g77990	0.0224727	-2.26
260902_at	At1g21440	0.00565379	-2.63		251218_at	At3g62410	0.00813025	-2.25
245384_at	At4g16790	0.00031976	-2.62		253954_at	At4g26970	0.00718576	-2.25
266464_at	At2g47800	0.00540734	-2.62		255016_at	At4g10120	0.00107465	-2.25
248819_at	At5g47050	0.00189811	-2.61		262653_at	At1g14130	0.0171125	-2.25
251677_at	At3g56980	0.00920201	-2.6		267238_at	At2g44130	0.00526842	-2.25
255437_at	At4g03060	0.0222642	-2.6		245090_at	At2g40900	0.00112187	-2.24
256528_at	At1g66140	0.0106201	-2.6		247282_at	At5g64240	0.00124625	-2.24
257880_at	At3g16910	0.00020087	-2.6		247600_at	At5g60890	0.0347999	-2.24
261048_at	At1g01420	0.00170569	-2.6		247819_at	At5g58350	0.016196	-2.24
249136_at	At5g43180	0.00717171	-2.59		249928_at	At5g22250	0.0148311	-2.24
254783_at	At4g12830	0.00129853	-2.59		250129_at	At5g16450	0.00439987	-2.24
259708_at	At1g77420	0.00230067	-2.59		265720_at	At2g40110	0.00140695	-2.24
263788_at	At2g24580	0.0255847	-2.59		248144_at	At5g54800	0.00276436	-2.23
250129_at	At5g16450	0.00111416	-2.58		251195_at	At3g62930	0.0228334	-2.23
255331_at	At4g04330	0.0463174	-2.58		264942_at	At1g67340	0.00507863	-2.23
265245_at	At2g43060	0.00149325	-2.58		246682_at	At5g33290	0.00290624	-2.22
251291_at	At3g61900	0.00198908	-2.57		256664_at	At3g12040	0.00553091	-2.22
265170_at	At1g23730	0.023283	-2.57		257175_s_at	At3g23470 At3g23480	0.00452787	-2.22
244974_at	AtCg00700	0.00442923	-2.56		259365_at	At1g13300	0.0408349	-2.22
246582_at	At1g31750	0.00313131	-2.56		262615_at	At1g13950	0.036437	-2.22
248769_at	At5g47730	0.00580043	-2.56		264204_at	At1g22710	0.0109108	-2.22
250408_at	At5g10930	0.00573475	-2.56		264738_at	At1g62250	0.00967911	-2.22
261456_at	At1g21050	0.00167711	-2.56		251358_at	At3g61160	0.00676147	-2.21
262926_s_at	At1g65790 At1g65800	0.00190461	-2.56		254919_at	At4g11360	0.00716396	-2.21
265342_at	At2g18300	0.00422936	-2.56		244974_at	AtCg00700	0.0224826	-2.2
252178_at	At3g50750	0.00443924	-2.55		255243_at	At4g05590	0.013035	-2.2
254430_at	At4g20820	0.00019476	-2.55		263250_at	At2g31390	0.0412547	-2.2
254532_at	At4g19660	0.00072294	-2.55		263714_at	At2g20610	0.00665884	-2.2
261576_at	At1g01070	0.00120044	-2.55		266391_at	At2g41290	0.0179942	-2.2
262162_at	At1g78020	0.0143344	-2.55		245384_at	At4g16790	0.00207558	-2.19
263168_at	At1g03020	0.00331349	-2.55		250279_at	At5g13200	0.0111567	-2.19
265075_at	At1g55450	0.0172932	-2.55		250485_at	At5g09990	0.00666586	-2.19
258047_at	At3g21240	0.00313372	-2.54		252572_at	At3g45290	0.00450071	-2.19
252040_at	At3g52060	0.00014848	-2.53		261193_at	At1g32920	0.043937	-2.19
254741_s_at	At4g13900 At4g13920	0.0008419	-2.53		262229_at	At1g68620	0.0372114	-2.19
264929_at	At1g60730	0.020722	-2.53		247793_at	At5g58650	0.00314187	-2.18
265454_at	At2g46530	0.0024375	-2.53		250339_at	At5g11670	0.0128008	-2.18
245324_at	At4g17260	0.0189772	-2.52		251028_at	At5g02230	0.0197992	-2.18
251885_at	At3g54050	0.00156315	-2.52		261110_at	At1g75440	0.00358875	-2.18
253806_at	At4g28270	0.00541152	-2.52		265059_at	At1g52080	0.00447444	-2.18
257832_at	At3g26740	0.043505	-2.52		265892_at	At2g15020	0.00537492	-2.18
249639_at	At5g36930	0.00064589	-2.51		246582_at	At1g31750	0.00410793	-2.17
251762_at	At3g55800	0.00038353	-2.51		254496_at	At4g20070	0.00652508	-2.17
254289_at	At4g22980	0.0316352	-2.51		265276_at	At2g28400	0.035319	-2.17
255310_at	At4g04955	0.00205455	-2.51		252983_at	At4g37980	0.0231572	-2.16
256796_at	At3g22210	0.00185722	-2.51		254532_at	At4g19660	0.00348496	-2.16
253987_at	At4g26270	0.00049318	-2.5		262803_at	At1g21000	0.00138234	-2.16
260011_at	At1g68110	0.00015338	-2.5		265189_at	At1g23840	0.00552194	-2.16
262309_at	At1g70820	0.00888751	-2.5		266279_at	At2g29290	0.00770075	-2.16
248710_at	At5g48480	0.00188923	-2.49		256178_s_at	At1g51760 At1g51780	0.0463039	-2.15
254573_at	At4g19420	0.00940932	-2.49		258807_at	At3g04030	0.00609225	-2.15
261758_at	At1g08250	0.0005914	-2.49		259778_at	At1g29600	0.0217245	-2.15
264987_at	At1g27030	0.0388753	-2.49		265530_at	At2g06050	0.00358875	-2.15
245957_at	At5g19590	0.00580371	-2.48		267612_at	At2g26690	0.00276436	-2.15
253228_at	At4g34630	0.0002036	-2.48		253414_at	At4g33050	0.0475942	-2.14
255121_at	At4g08480	0.0008419	-2.48		248172_at	At5g54660	0.00450071	-2.13
259034_at	At3g09410	0.00165123	-2.48		255578_at	At4g01450	0.00803743	-2.13
244973_at	AtCg00690	0.0095387	-2.47		257628_at	At3g26290	0.00348496	-2.13
256674_at	At3g52360	0.00118199	-2.47		267010_at	At2g39250	0.0358269	-2.13
247282_at	At5g64240	0.00055799	-2.46		245957_at	At5g19590	0.023218	-2.12
254188_at	At4g23920	0.00100605	-2.46		251826_at	At3g55110	0.0102662	-2.12
259875_s_at	At1g76680 At1g76690	0.0306423	-2.46		255521_at	At4g02280	0.00348496	-2.12
262615_at	At1g13950	0.0149359	-2.46		266326_at	At2g46650	0.00200962	-2.12
263584_at	At2g17040	0.0029209	-2.46		247009_at	At5g67600	0.016346	-2.11
263709_at	At1g09310	0.0111594	-2.46		253806_at	At4g28270	0.0179448	-2.11
251733_at	At3g56240	0.00105009	-2.45		256293_at	At1g69440	0.0195571	-2.11
254744_at	At4g13345	0.003675	-2.45		257615_at	At3g26510	0.00849406	-2.11
255488_at	At4g02630	0.0116305	-2.45		258566_at	At3g04110	0.00894967	-2.11
258108_at	At3g23570	0.00014848	-2.45		245049_at	AtCg00050	0.0383002	-2.1
249619_at	At5g37500	0.00111199	-2.44		246440_at	At5g17650	0.00302823	-2.1
254201_at	At4g24130	0.00479358	-2.44		258047_at	At3g21240	0.0132545	-2.1
265189_at	At1g23840	0.00190273	-2.44		261375_at	At1g53160	0.0454873	-2.1
260419_at	At1g69730	0.00073123	-2.43		263690_at	At1g26960	0.00513621	-2.1
264873_at	At1g24100	0.00084469	-2.43		264779_at	At1g08570	0.00184018	-2.1
266983_at	At2g39400	0.00040643	-2.43		264986_at	At1g27130	0.00371694	-2.1
245197_at	At1g67800	0.00073123	-2.42		246270_at	At4g36500	0.0319664	-2.09
248172_at	At5g54660	0.00205455	-2.42		252363_at	At3g48460	0.036743	-2.09
250670_at	At5g06860	0.0482167	-2.42		256255_at	At3g11280	0.00754585	-2.09
251195_at	At3g62930	0.0124183	-2.42		266572_at	At2g23840	0.0019721	-2.09
257421_at	At1g12030	0.0177778	-2.42		247931_at	At5g57040	0.00520117	-2.08
259327_at	At3g16460	0.0281196	-2.42		254225_at	At4g23670	0.0332903	-2.08
261191_at	At1g32900	0.0292199	-2.42		261618_at	At1g33110	0.00358875	-2.08
265894_at	At2g15050	0.00303311	-2.42		264299_s_at	At1g78850 At1g78860	0.0230342	-2.08
260362_at	At1g70530	0.00262958	-2.41		246701_at	At5g28020	0.0224727	-2.07
245090_at	At2g40900	0.00187348	-2.4		248819_at	At5g47050	0.012116	-2.07
248544_at	248544_at	0.00127437	-2.4		249197_at	At5g42380	0.0196124	-2.07
253638_at	At4g30470	0.00676682	-2.4		254716_at	At4g13560	0.0203322	-2.07
254735_at	At4g13810	0.0388803	-2.4		264052_at	At2g22330	0.00996567	-2.07
265817_at	At2g18050	0.0166341	-2.4		264288_at	At1g62045	0.036743	-2.07
251301_at	At3g61880	0.0222501	-2.39		245854_at	At5g13490	0.0035486	-2.06
252534_at	At3g46130	0.0321928	-2.39		262958_at	At1g54410	0.00870731	-2.06
257194_at	At3g13110	0.00126962	-2.39		263545_at	At2g21560	0.0237165	-2.06
259495_at	At1g15890	0.00104132	-2.38		263584_at	At2g17040	0.0102081	-2.06
260415_at	At1g69790	0.00092702	-2.38		267359_at	At2g40020	0.0417963	-2.06
262731_at	At1g16420	0.0360536	-2.38		249581_at	At5g37600	0.00780081	-2.05
250090_at	At5g17330	0.00732309	-2.37		253630_at	At4g30490	0.00427046	-2.05
250316_at	At5g12140	0.00090485	-2.37		255255_at	At4g05070	0.00163798	-2.05
261149_s_at	At1g19550 At1g19570	0.00114174	-2.37		255763_at	At1g16730	0.00628598	-2.05
263405_s_at	At2g04066 At2g04080	0.00039244	-2.37		256596_at	At3g28540	0.00348496	-2.05
246417_at	At5g16990	0.00218956	-2.36		266461_at	At2g47730	0.00151762	-2.05
251670_at	At3g57190	0.00035555	-2.36		245385_at	At4g14020	0.00423885	-2.04
265128_at	At1g30860	0.00463155	-2.36		252178_at	At3g50750	0.0161827	-2.04
265339_at	At2g18230	0.0286898	-2.36		256756_at	At3g25610	0.0196721	-2.04
245010_at	AtCg00420	0.0365842	-2.35		258890_at	At3g05690	0.0025139	-2.04
251084_at	At5g01520	0.00048078	-2.35		267503_at	At2g45600	0.0371744	-2.04
252625_at	At3g44750	0.00304661	-2.35		244998_at	AtCg00180	0.0458277	-2.03
256489_at	At1g31550	0.00469503	-2.35		253697_at	At4g29700	0.0475152	-2.03
260924_at	At1g21590	0.00261591	-2.35		259308_at	At3g05180	0.0193863	-2.03
252858_at	At4g39770	0.00430152	-2.34		261758_at	At1g08250	0.00527711	-2.03
256453_at	At1g75270	0.0043359	-2.34		250316_at	At5g12140	0.00244658	-2.02
256978_at	At3g21110	0.00190461	-2.34		251790_at	At3g55470	0.00413311	-2.02
261832_at	At1g10650	0.00199829	-2.34		260060_at	At1g73680	0.00519583	-2.02
262693_at	At1g62780	0.0103292	-2.34		260353_at	At1g69230	0.0192776	-2.02
265233_s_at	At2g07718 AtMg00590	0.00077686	-2.34		261895_at	At1g80830	0.00466055	-2.02
255502_at	At4g02410	0.00210891	-2.33		265233_s_at	At2g07718 AtMg00590	0.00237206	-2.02
255575_at	At4g01430	0.00098747	-2.33		248164_at	At5g54490	0.0426539	-2.01
258001_at	At3g28950	0.00190273	-2.33		248769_at	At5g47730	0.0202365	-2.01
262229_at	At1g68620	0.0290137	-2.33		249288_at	At5g41050	0.0283042	-2.01
264942_at	At1g67340	0.0020584	-2.33		249944_at	At5g22290	0.00526842	-2.01
265530_at	At2g06050	0.0071107	-2.33		254741_s_at	At4g13900 At4g13920	0.0137504	-2.01
254259_s_at	At4g23420 At4g23430	0.00855566	-2.32		257650_at	At3g16800	0.0212616	-2.01
255923_at	At1g22180	0.0034223	-2.32		261013_at	At1g26440	0.00252646	-2.01
258275_at	At3g15760	0.00202077	-2.32		244966_at	AtCg00600	0.0472125	-2
258299_at	At3g23410	0.00343492	-2.32		245993_at	At5g20700	0.0289154	-2
245592_at	At4g14540	0.00039936	-2.31		248392_at	At5g52050	0.00506511	-2
246566_at	At5g14940	0.00983544	-2.31		261023_at	At1g12200	0.0240777	-2
256336_at	At1g72030	0.00449462	-2.31		247464_at	At5g62070	0.0292814	2
257960_at	At3g25570 At3g25572	0.00111082	-2.31		248573_at	At5g49720	0.00281598	2
260287_at	At1g80440	0.0141433	-2.31		255538_at	At4g01680	0.00711157	2
262793_at	At1g13110	0.00223018	-2.31		258632_s_at	At3g07980 At3g13530	0.0444926	2
265249_at	At2g01940	0.00985338	-2.31		259642_at	At1g69030	0.0437415	2
247740_at	At5g58940	0.0113408	-2.3		260000_at	At1g68060	0.0357991	2
259150_at	At3g10320	0.0426418	-2.3		263193_at	At1g36050	0.0063297	2
264442_at	At1g27480	0.003675	-2.3		263765_at	At2g21540	0.00742048	2
267503_at	At2g45600	0.0134197	-2.3		264045_at	At2g22450	0.0279829	2
245049_at	AtCg00050	0.00155741	-2.29		264082_at	At2g28570	0.00868231	2
246108_at	At5g28630	0.00464515	-2.29		247191_at	At5g65310	0.0218449	2.01
246682_at	At5g33290	0.0043917	-2.29		247578_at	At5g61300	0.00384756	2.01
254803_at	At4g13100	0.00121244	-2.29		248718_at	At5g47770	0.0111156	2.01
256427_at	At3g11090	0.00122965	-2.29		250512_at	At5g09995	0.0245708	2.01
261785_at	At1g08230	0.00402236	-2.29		252868_at	At4g39920	0.00740625	2.01
265471_at	At2g37130	0.00493306	-2.29		253189_at	At4g35335	0.018939	2.01
247283_at	At5g64250	0.0299257	-2.28		264310_at	At1g62030	0.0118257	2.01
249911_at	At5g22740	0.00194946	-2.28		266117_at	At2g02170	0.0442656	2.01
260855_at	At1g21920	0.009449	-2.28		254284_at	At4g22910	0.0155904	2.02
261804_at	At1g30530	0.01241	-2.28		245334_at	At4g15800	0.0157637	2.03
264301_at	At1g78780	0.00144401	-2.28		248923_at	At5g45940	0.039453	2.03
264779_at	At1g08570	0.0010776	-2.28		252615_at	At3g45230	0.0141294	2.03
264899_at	At1g23130	0.00023668	-2.28		257938_at	At3g19820	0.0104618	2.03
265646_at	At2g27360	0.00187419	-2.28		258097_at	At3g23660	0.00786152	2.03
265726_at	At2g32010	0.00446955	-2.28		263412_at	At2g28720	0.00815878	2.03
266555_at	At2g46270	0.0104347	-2.28		246397_at	At1g58190	0.0339334	2.04
252827_at	At4g39950	0.00172402	-2.27		250505_at	At5g09870	0.0141294	2.04
247957_at	At5g57050	0.00261591	-2.26		252298_at	At3g49060	0.00409946	2.04
248395_at	At5g52120	0.00272413	-2.26		253004_at	At2g45250 At4g38280 At4g38330	0.00298989	2.04
249759_at	At5g24380	0.00291714	-2.26		254367_at	At4g21700	0.00953767	2.04
252925_at	At4g39100	0.0010496	-2.26		263989_at	At2g42880	0.0175116	2.04
266835_at	At2g29990	0.00084469	-2.26		267308_at	At2g30200	0.00928533	2.04
267538_at	At2g41870	0.00197479	-2.26		247132_at	At5g66200	0.0334841	2.05
247508_at	At5g62000	0.00356942	-2.25		248080_at	At5g55380	0.00195828	2.05
250528_at	At5g08600	0.00535278	-2.25		260151_at	At1g52910	0.00276436	2.05
250967_at	At5g02790	0.00745643	-2.25		260618_at	At1g53230	0.0409444	2.05
251594_at	At3g57630	0.00111124	-2.25		262261_at	At1g70895	0.00512896	2.05
252853_at	At4g39710	0.00596536	-2.25		263496_at	At2g42570	0.00223275	2.05
254952_at	At4g10955 At4g10960	0.00397571	-2.25		253631_at	At4g30440	0.0329279	2.06
256255_at	At3g11280	0.00267089	-2.25		253871_at	At4g27440	0.0261585	2.06
258566_at	At3g04110	0.00079727	-2.25		259234_at	At3g11620	0.00382504	2.06
261013_at	At1g26440	0.00060625	-2.25		246231_at	At4g37080	0.037742	2.07
266689_at	At2g19930	0.00615142	-2.25		248378_at	At5g51840	0.00232153	2.07
248144_at	At5g54800	0.00187348	-2.24		252374_at	At3g48100	0.0186905	2.07
258890_at	At3g05690	0.00122965	-2.24		256386_at	At1g66540	0.0172548	2.07
259778_at	At1g29600	0.0137134	-2.24		262376_at	At1g72970	0.00180143	2.07
262049_at	At1g80180	0.00188908	-2.24		265879_at	At2g42450	0.00234329	2.07
263477_at	At2g31790	0.00045834	-2.24		246633_at	At1g29720	0.0334841	2.08
263947_at	At2g35820	0.00155061	-2.24		247979_at	At5g56750	0.0136868	2.08
249059_at	At5g44530	0.00251275	-2.23		255483_at	At4g02500	0.00512896	2.08
253052_at	At4g37310	0.00073123	-2.23		262157_at	At1g52670	0.0142792	2.08
255622_at	At4g01070	0.0128882	-2.23		245130_at	At2g45340	0.0090695	2.09
257624_at	At3g26220	0.0301511	-2.23		246394_at	At1g58160	0.036666	2.09
259213_at	At3g09010	0.0198395	-2.23		247427_at	At5g62580	0.00660465	2.09
266296_at	At2g29420	0.0197256	-2.23		250254_at	At5g13710	0.00390457	2.09
266335_at	At2g32440	0.00159399	-2.23		252561_at	At3g45980	0.00288063	2.09
246270_at	At4g36500	0.0350886	-2.22		252711_at	At3g43720	0.00553599	2.09
246818_at	At5g27270	0.00037712	-2.22		259848_at	At1g72180	0.0110998	2.09
247816_at	At5g58260	0.0130092	-2.22		245339_at	At4g16120	0.00807413	2.1
249928_at	At5g22250	0.0450262	-2.22		247741_at	At5g58960	0.00285264	2.1
259544_at	At1g20620	0.00301906	-2.22		251072_at	At5g01740	0.0244692	2.1
260420_at	At1g69610	0.00624563	-2.22		253021_at	At4g38050	0.0234464	2.1
262888_at	At1g14790	0.00246557	-2.22		255344_s_at	At4g04540 At4g04570	0.00787038	2.1
265929_s_at	At2g18560 At2g18570	0.00065391	-2.22		255881_at	At1g67070	0.0110683	2.1
266396_at	At2g38790	0.00055799	-2.22		257932_at	At3g17040	0.0147253	2.1
257147_at	At3g27270	0.0020584	-2.21		259600_at	At1g35220	0.012699	2.1
266391_at	At2g41290	0.0146963	-2.21		259721_at	At1g60890	0.0181908	2.1
245629_at	At1g56580	0.00097401	-2.2		262038_at	At1g35580	0.00541257	2.1
247041_at	At5g67180	0.00239738	-2.2		262840_at	At1g14900	0.0111944	2.1
247541_at	At5g61660	0.00331349	-2.2		266163_at	At2g28130	0.0141281	2.1
248550_at	At5g50210	0.0017324	-2.2		259504_at	At1g15690	0.00151762	2.11
252183_at	At3g50740	0.0202207	-2.2		262609_at	At1g13930	0.0371744	2.11
258385_at	At3g15510	0.00265574	-2.2		267279_at	At2g19460	0.00475297	2.11
266278_at	At2g29300	0.00128288	-2.2		251771_at	At3g56000	0.00237206	2.12
245731_at	At1g73500	0.012101	-2.19		258355_at	At3g14330	0.0213853	2.12
247575_at	At5g61030	0.013223	-2.19		266489_at	At2g35190	0.0414942	2.12
252543_at	At3g45780	0.00055167	-2.19		255232_at	At4g05330	0.0141294	2.13
258033_at	At3g21250	0.00846732	-2.19		255662_at	At4g00400	0.0235622	2.13
262010_at	At1g35612	0.00343146	-2.19		256575_at	At3g14790	0.00348496	2.13
266372_at	At2g41310	0.00294165	-2.19		264266_at	At1g09160	0.00725034	2.13
246998_at	At5g67370	0.00268487	-2.18		246952_at	At5g04820	0.0292781	2.14
259841_at	At1g52200	0.0306089	-2.18		247461_at	At5g62100	0.0123439	2.14
265682_at	At2g24390	0.0148307	-2.18		248006_at	At5g56250	0.010238	2.14
265720_at	At2g40110	0.00136842	-2.18		250939_at	At5g03040	0.0085659	2.14
266979_at	At2g39470	0.003463	-2.18		253876_at	At4g27430	0.00119072	2.14
245385_at	At4g14020	0.0024375	-2.17		256160_at	At1g30120	0.00146154	2.14
249920_at	At5g19260	0.0267194	-2.17		258988_at	At3g08890	0.00341207	2.14
251143_at	At5g01220	0.0430622	-2.17		261975_at	At1g64640	0.00210955	2.14
255503_at	At4g02420	0.00044149	-2.17		245698_at	At5g04160	0.00553091	2.15
263761_at	At2g21330	0.00040537	-2.17		253190_at	At4g35335	0.00458172	2.15
264525_at	At1g10060	0.0050011	-2.17		262839_at	At1g14770	0.00405425	2.15
248585_at	At5g49640	0.00150045	-2.16		264315_at	At1g70370	0.0170772	2.15
248967_at	At5g45350	0.000406	-2.16		264513_at	At1g09420	0.00256412	2.15
253525_at	At4g31330	0.013223	-2.16		245600_at	At4g14230	0.00614392	2.16
254247_at	At4g23260	0.00188908	-2.16		260667_at	At1g19440	0.0268709	2.16
258263_at	At3g15780	0.00188743	-2.16		249118_at	At5g43870	0.0169702	2.17
263032_at	At1g23850	0.00102334	-2.16		249372_at	At5g40760	0.00889076	2.17
246463_at	At5g16970	0.0108074	-2.15		249782_at	At5g24260	0.00553599	2.17
248581_at	At5g49900	0.00532042	-2.15		252923_at	252923_at	0.00100946	2.17
249124_at	At5g43740	0.00809332	-2.15		254798_at	At4g13050	0.00439987	2.17
253746_at	At4g29100	0.00162199	-2.15		255714_at	At4g00300	0.0107072	2.17
254300_at	At4g22780	0.00488833	-2.15		259611_at	At1g52280	0.0056113	2.17
254919_at	At4g11360	0.00626527	-2.15		263979_at	At2g42840	0.0130302	2.17
260799_at	At1g78270	0.00075507	-2.15		246420_at	At5g16870	0.00409946	2.18
261782_at	At1g76110	0.00867836	-2.15		257879_at	At3g17160	0.00100946	2.18
264938_at	At1g60610	0.0140399	-2.15		258298_at	At3g23300	0.00803743	2.18
249309_at	At5g41410	0.00057587	-2.14		261252_at	At1g05810	0.00605941	2.18
254460_at	At4g21210	0.0013787	-2.14		262844_at	At1g14890	0.00095845	2.18
258201_at	At3g13910	0.0249007	-2.14		247491_at	At5g61880	0.00239159	2.19
259953_at	At1g74810	0.00469647	-2.14		256311_at	At1g30330	0.0261585	2.19
264300_at	At1g78670	0.00217622	-2.14		257964_at	At3g19850	0.00206639	2.19
265823_at	At2g35760	0.00080879	-2.14		258684_at	At3g08680	0.0314298	2.19
266572_at	At2g23840	0.00124448	-2.14		261492_at	At1g14290	0.00239159	2.19
247794_at	At5g58670	0.00852821	-2.13		248903_at	At5g46290	0.00147438	2.2
247931_at	At5g57040	0.00117596	-2.13		256458_at	At1g75220	0.0403189	2.2
250960_at	At5g02940	0.00563575	-2.13		264521_at	At1g10020	0.00365567	2.2
254496_at	At4g20070	0.00285686	-2.13		259010_at	At3g07340	0.00611029	2.21
255088_at	At4g09350	0.00485294	-2.13		261131_at	At1g19835	0.0172497	2.21
256829_at	At3g22850	0.00055799	-2.13		248690_at	At5g48230	0.00177547	2.22
252996_s_at	At4g38460	0.00172986	-2.12		254320_at	At4g22580	0.0267828	2.22
254024_at	At4g25780	0.00150593	-2.12		258554_at	At3g06980	0.00087102	2.22
256366_at	At1g66880	0.0044137	-2.12		266792_at	At2g02860	0.0294933	2.22
256675_at	At3g52170	0.0375752	-2.12		247480_at	At5g62390	0.00352338	2.23
257860_at	At3g13062	0.00264747	-2.12		248608_at	At5g49460	0.00071465	2.23
262748_at	At1g28610	0.00640191	-2.12		248975_at	At5g45040	0.00348496	2.23
265078_at	At1g55500	0.00484044	-2.12		252820_at	At3g42640	0.00374962	2.23
247964_at	At5g56600	0.00550199	-2.11		258123_at	At3g18040	0.0164143	2.23
249486_at	At5g39030	0.00084837	-2.11		261685_at	At1g47290	0.00153314	2.23
261075_at	At1g07280	0.0164123	-2.11		251183_at	At3g62630	0.0427781	2.24
261212_at	At1g12880	0.0252428	-2.11		252123_at	At3g51240	0.038263	2.24
262958_at	At1g54410	0.00064764	-2.11		254431_at	At4g20840	0.0012743	2.24
252274_at	At3g49680	0.00316624	-2.1		245141_at	At2g45400	0.0497901	2.25
256225_at	At1g56220	0.00602852	-2.1		249457_s_at	At1g66040 At1g66050 At5g39550	0.0265282	2.25
261538_at	At1g01830	0.00188743	-2.1		249818_at	At5g23860	0.0287032	2.25
261684_at	At1g47400	0.0201923	-2.1		252759_at	At3g42630	0.00124329	2.26
249527_at	At5g38710	0.0161287	-2.09		255428_at	At4g03390	0.0174225	2.26
255319_at	At4g04220	0.00866909	-2.09		259592_at	At1g27950	0.0310133	2.26
257466_at	At1g62840	0.0435587	-2.09		260519_at	At1g51540	0.00566501	2.26
262882_at	At1g64900	0.0012705	-2.09		250292_at	At5g13220	0.00808184	2.27
266673_at	At2g29630	0.00481339	-2.09		260536_at	At2g43400	0.0414495	2.27
247443_at	At5g62720	0.0190868	-2.08		245861_at	At5g28300	0.0147253	2.28
255230_at	At4g05390	0.0150903	-2.08		245915_s_at	At5g19770 At5g19780	0.00650603	2.28
247356_at	At5g63800	0.00083523	-2.07		246555_at	At5g15470	0.0141281	2.28
252463_at	At3g47070	0.00060914	-2.07		249123_at	At5g43760	0.00138905	2.28
253697_at	At4g29700	0.0338207	-2.07		250550_at	At5g07870	0.00210955	2.28
254710_at	At4g18050	0.00357197	-2.07		260009_at	At1g67950	0.0203698	2.28
254998_at	At4g09760	0.00163056	-2.07		262694_at	At1g62790	0.0299639	2.28
261692_at	At1g08450	0.00095404	-2.07		246650_at	At5g35160	0.00112187	2.29
261754_at	At1g76130	0.00955448	-2.07		254701_at	At4g18030	0.0184272	2.29
262313_at	At1g70900	0.0100896	-2.07		256970_at	At3g21090	0.0144093	2.29
263401_at	At2g04070	0.0273224	-2.07		262846_at	At1g14670	0.00134165	2.29
265913_at	At2g25625	0.0418319	-2.07		264561_at	At1g55810	0.0053235	2.29
248123_at	At5g54720	0.00277711	-2.06		245783_s_at	At1g35170 At1g35180	0.00539161	2.3
249581_at	At5g37600	0.00145794	-2.06		257769_at	At3g23050	0.00300079	2.3
253747_at	At4g29050	0.00539288	-2.06		254893_at	At4g11830	0.00765843	2.31
256168_at	At1g51805	0.00158863	-2.06		257798_at	At3g15950	0.012735	2.31
256828_at	At3g22968 At3g22970	0.00150593	-2.06		253496_at	At4g31870	0.0434337	2.32
258976_at	At3g01980	0.018251	-2.06		266014_s_at	At2g07722 AtMg00170 AtMg00620	0.0410205	2.32
259179_at	At3g01660	0.0116966	-2.06		246251_at	At4g37220	0.0142602	2.33
259382_s_at	At3g16420 At3g16430	0.0175722	-2.06		249069_at	At5g44010	0.0161795	2.33
262518_at	At1g17170	0.0383993	-2.06		249847_at	At5g23210	0.0151094	2.33
262751_at	At1g16310	0.00037282	-2.06		255062_at	At4g08940	0.00695546	2.33
265990_at	At2g24280	0.00294523	-2.06		261924_at	At1g22550	0.00566227	2.34
250186_at	At5g14500	0.00855566	-2.05		259437_at	At1g01540	0.00515308	2.35
251272_at	At3g61890	0.0111023	-2.05		260493_at	At2g41830	0.00512896	2.35
252133_at	At3g50900	0.00268072	-2.05		267532_at	At2g42040	0.015426	2.35
254592_at	At4g18880	0.00604784	-2.05		248095_at	At5g55230	0.0200565	2.36
257054_at	At3g15353	0.00075966	-2.05		256825_at	At3g22120	0.015936	2.36
262175_at	At1g74880	0.00511039	-2.05		260423_at	At1g72470	0.0102328	2.36
246194_at	At4g37000	0.0110784	-2.04		261663_at	At1g18330	0.0132503	2.36
248267_at	At5g53460	0.00734654	-2.04		266175_at	At2g02450	0.00180894	2.36
251705_at	At3g56400	0.0175549	-2.04		245800_at	At1g46264	0.0122104	2.37
261407_at	At1g18810	0.0144476	-2.04		247974_at	At5g56780	0.00162847	2.37
261713_at	At1g32640	0.0135835	-2.04		256516_at	At1g66150	0.00237206	2.37
263574_at	At2g16990	0.0460598	-2.04		260975_at	At1g53430	0.0199786	2.37
254193_at	At4g23870	0.0374357	-2.03		262552_at	At1g31350	0.0188991	2.37
254928_at	At4g11410	0.00380804	-2.03		266424_at	At2g41330	0.0203322	2.38
260540_at	At2g43500	0.0214277	-2.03		253687_at	At4g29520	0.00352333	2.39
261151_at	At1g19650	0.00263058	-2.03		254807_at	At4g12700	0.00439987	2.39
261315_at	At1g53170	0.00271134	-2.03		246097_at	At5g20270	0.00964488	2.4
263842_at	At2g36835	0.00453385	-2.03		249732_at	At5g24420	0.00573102	2.4
265042_at	At1g04040	0.0135529	-2.03		250420_at	At5g11260	0.00382504	2.4
265192_at	At1g05060	0.00174492	-2.03		256396_at	At3g06150	0.00316454	2.4
266235_at	At2g02360	0.00432997	-2.03		260967_at	At1g12230	0.00221665	2.4
245292_at	At4g15093	0.00147749	-2.02		250261_at	At5g13400	0.0294857	2.41
248764_at	At5g47640	0.0168258	-2.02		251858_at	At3g54820	0.00358875	2.41
249941_at	At5g22270	0.00650607	-2.02		253330_at	At4g33530	0.00207558	2.41
256880_at	At3g26450	0.0040015	-2.02		263456_at	At2g22125	0.0067752	2.41
260466_at	At1g10900	0.0103974	-2.02		263591_at	At2g01910	0.00358875	2.41
261806_at	At1g30510	0.00324856	-2.02		263656_at	At1g04240	0.0150568	2.41
247357_at	At5g63710	0.00148054	-2.01		261273_at	At1g26650	0.00239159	2.42
247940_at	At5g57190	0.00563575	-2.01		263953_at	At2g36050	0.0156824	2.42
248590_at	At5g49660	0.00777132	-2.01		264271_at	At1g60270	0.0039577	2.42
254331_s_at	At4g22690 At4g22710	0.0122647	-2.01		266119_at	At2g02100	0.0423218	2.42
260167_at	At1g71970	0.0108074	-2.01		246843_at	At5g26740	0.0102151	2.43
262943_at	At1g79470	0.00169054	-2.01		248941_s_at	At5g45460 At5g45470	0.00055195	2.43
246326_at	At1g16590	0.01943	-2		250663_at	At5g07110	0.00270624	2.43
247792_at	At5g58787	0.00141594	-2		256836_at	At3g22960	0.00078297	2.43
249524_at	At5g38520	0.00188743	-2		253428_at	At4g32410	0.00164185	2.44
249727_at	At5g35490	0.00261591	-2		261451_at	At1g21060	0.0016376	2.44
251752_at	At3g55740	0.00237937	-2		261688_at	At1g47380	0.00154821	2.44
253096_at	At4g37330	0.00160879	-2		267038_at	At2g38480	0.0070146	2.44
253550_at	At4g30960	0.00144118	-2		258383_at	At3g15440	0.00249574	2.45
256130_at	At1g18170	0.0102856	-2		260368_at	At1g69700	0.00890713	2.45
257126_at	At3g20060	0.00073123	-2		263275_at	At2g14170	0.00352338	2.45
258161_at	At3g17930	0.00467458	-2		263840_at	At2g36885	0.00280522	2.45
263352_at	At2g22080	0.00129136	-2		267592_at	At2g39710	0.00894967	2.45
263696_at	At1g31230	0.0108074	-2		251630_at	At3g57420	0.00237108	2.46
263952_s_at	At2g35810 At2g35830	0.0131002	-2		255692_at	At4g00400	0.0214931	2.46
266170_at	At2g39050	0.01339	-2		258326_at	At3g22760	0.00219718	2.46
248420_at	At5g51560	0.00101051	2		263593_at	At2g01860	0.00153314	2.46
248943_s_at	At5g45440 At5g45490	0.00103151	2		264238_at	At1g54740	0.0119174	2.46
252097_at	At3g51090	0.00264747	2		267200_at	At2g31010	0.00539927	2.46
256061_at	At1g07040	0.0239273	2		267265_at	At2g22980	0.00155032	2.46
256386_at	At1g66540	0.0167229	2		250827_at	At5g05170	0.00123165	2.47
257337_at	AtMg00060	0.00680341	2		263179_at	At1g05710	0.00336927	2.47
258988_at	At3g08890	0.00555476	2		251308_at	At3g61130	0.00151762	2.48
260296_at	At1g63750	0.00362997	2		253156_at	At4g35730	0.023194	2.48
266047_at	At2g40800	0.0041577	2		258332_at	At3g16180	0.0216722	2.48
247616_at	At5g60260	0.0029752	2.01		259859_at	At1g68410	0.0497901	2.48
250844_at	At5g04470	0.00161619	2.01		265111_at	At1g62510	0.0095406	2.48
253590_at	253590_at	0.0124347	2.01		254294_at	At4g23070	0.0164691	2.49
254098_at	At4g25100	0.00188908	2.01		256877_at	At3g26470	0.00601224	2.49
256548_at	At3g14770	0.00570009	2.01		259794_at	At1g64330	0.0280406	2.49
258132_at	At3g24550	0.00332097	2.01		262543_at	At1g34245	0.0112637	2.49
258728_at	At3g11800	0.0048925	2.01		251899_at	At3g54400	0.0111489	2.5
263398_at	At2g31680	0.00369092	2.01		262033_at	At1g37140	0.0167174	2.5
264045_at	At2g22450	0.0178149	2.01		264700_at	At1g70100	0.00264079	2.5
266901_at	At2g34600	0.0265242	2.01		245323_at	At4g16500	0.035076	2.51
251225_at	At3g62660	0.00054131	2.02		249073_at	At5g44020	0.00443869	2.51
253522_at	At4g31290	0.0184769	2.02		258736_at	At3g05900	0.00311851	2.51
253876_at	At4g27430	0.00070666	2.02		261404_at	At1g18690	0.00374962	2.51
258332_at	At3g16180	0.030777	2.02		267515_at	At2g45680	0.00466055	2.51
259882_at	At1g76670	0.00193268	2.02		245110_at	At2g41550	0.00467773	2.52
260423_at	At1g72470	0.00432522	2.02		247128_at	At5g66110	0.00236499	2.52
261068_at	At1g07450	0.00411363	2.02		251494_at	At3g59350	0.00527711	2.53
245211_at	At5g12370	0.00172402	2.03		260501_at	At2g41770	0.00736986	2.53
249452_at	At5g39500	0.00197863	2.03		247161_at	At5g65810	0.0293374	2.54
249763_at	At5g24010	0.00669334	2.03		266254_at	At2g27810	0.00112773	2.54
251090_at	At5g01340	0.00830064	2.03		248578_at	At5g49820	0.00042942	2.55
251901_at	At3g54100	0.00704611	2.03		251413_at	At3g60320	0.00450071	2.55
254562_at	At4g19230	0.0239074	2.03		258676_at	At3g08600	0.0123418	2.55
259041_at	At3g07330	0.00109607	2.03		246772_at	At5g27490	0.0495609	2.56
259077_s_at	At3g02230 At5g15650	0.00767237	2.03		248506_at	At5g50370	0.00589709	2.56
260705_at	At1g32400	0.00048292	2.03		257766_at	At3g23030	0.00743906	2.56
267349_at	At2g40010	0.00413736	2.03		258357_at	At3g14350	0.00562678	2.58
248903_at	At5g46290	0.00098747	2.04		259020_at	At3g07470	0.00338685	2.58
249847_at	At5g23210	0.00560054	2.04		259607_at	At1g27940	0.00870646	2.58
250879_at	At5g04060	0.00252193	2.04		267481_at	At2g02780	0.00652508	2.58
251281_at	At3g61640	0.00175618	2.04		248784_at	At5g47380	0.00249574	2.59
252123_at	At3g51240	0.0023215	2.04		251036_at	At5g02160	0.0048133	2.59
252820_at	At3g42640	0.0013905	2.04		251133_at	At5g01240	0.00132662	2.59
252923_at	252923_at	0.0005914	2.04		251855_at	At3g54690	0.00120415	2.59
256020_at	At1g58290	0.0135515	2.04		253300_at	At4g33580	0.00298989	2.59
257932_at	At3g17040	0.00390027	2.04		258421_at	At3g16690	0.00197124	2.59
258527_at	At3g06850	0.0430188	2.04		264280_at	At1g61820	0.0387702	2.59
259788_at	At1g29670	0.00131566	2.04		266643_s_at	At2g29710 At2g29730	0.013004	2.59
261673_at	At1g18280	0.00750231	2.04		245771_at	245771_at	0.0266433	2.6
261866_at	At1g50420	0.00256647	2.04		255962_at	At1g22330	0.00379693	2.6
263108_at	At1g65240	0.0112707	2.04		265120_at	At1g62640	0.00439671	2.6
263380_at	At2g40200	0.0241622	2.04		245644_at	At1g25320	0.00293546	2.61
264526_at	At1g10130	0.00429327	2.04		247439_at	At5g62670	0.00103887	2.61
266424_at	At2g41330	0.0161947	2.04		247845_at	At5g58090	0.00071267	2.61
248564_at	At5g49700	0.00725063	2.05		260830_at	At1g06760	0.0163078	2.61
250743_at	At5g05820	0.00293394	2.05		249456_at	At5g39410	0.0297393	2.62
257334_at	AtMg01370	0.00133405	2.05		246288_at	At1g31850	0.0145171	2.63
266371_at	At2g41410	0.0115132	2.05		251714_at	At3g56370	0.0277386	2.63
267096_at	At2g38180	0.00048913	2.05		258483_at	At3g02570	0.00107577	2.64
267290_at	At2g23740	0.00595239	2.05		266325_at	At2g46630	0.00237206	2.64
249172_at	At5g42950	0.0029913	2.06		259763_at	At1g77630	0.00358875	2.65
259321_at	At3g01040	0.00162793	2.06		261117_at	At1g75310	0.00562678	2.65
259600_at	At1g35220	0.00685114	2.06		259104_at	At3g02170	0.00866504	2.66
260457_at	At1g72480	0.0369989	2.06		261570_at	At1g01120	0.00439987	2.66
264056_at	At2g28510	0.00188064	2.06		255885_at	At1g20330	0.00140695	2.67
264098_at	At1g79260	0.00166842	2.06		258134_at	At3g24530	0.0007396	2.67
244951_s_at	At2g07723 AtMg00180	0.0008419	2.07		259106_at	At3g05490	0.0165457	2.67
250512_at	At5g09995	0.00897379	2.07		245291_at	At4g16155	0.0005106	2.68
251183_at	At3g62630	0.0406126	2.07		251861_at	At3g54810	0.00155032	2.68
255403_at	At4g03400	0.00881143	2.07		261346_at	At1g79720	0.00169207	2.68
255714_at	At4g00300	0.00304661	2.07		265283_at	At2g20370	0.0056498	2.68
256575_at	At3g14790	0.00187228	2.07		254931_at	At4g11460	0.0147253	2.69
258891_at	258891_at	0.00075623	2.07		257173_at	At3g23810	0.0130519	2.69
260337_at	At1g69310	0.00105883	2.07		255652_at	At4g00950	0.0359361	2.7
261674_at	At1g18270	0.015793	2.07		255878_at	At2g40620	0.00338685	2.7
247535_at	At5g61620	0.00432997	2.08		258796_at	At3g04630	0.00515308	2.7
249806_at	At5g23850	0.00255725	2.08		265356_at	At2g16595	0.00358875	2.7
251450_at	At3g60030	0.00295476	2.08		267492_at	At2g30620	0.00770075	2.7
253631_at	At4g30440	0.00210891	2.08		264378_at	At2g25220	0.00285609	2.71
259023_at	At3g07510	0.00666218	2.08		266904_at	At2g34590	0.00130556	2.72
259665_at	At1g55160	0.00105452	2.08		246510_at	At5g15410	0.00112187	2.73
262143_at	At1g52630	0.00203077	2.08		255082_at	255082_at	0.00153314	2.73
264535_at	At1g55690	0.00163056	2.08		261639_at	At1g50010	0.00197836	2.73
245853_at	At5g13500	0.00200483	2.09		263249_at	At2g31360	0.00443869	2.73
246195_at	At4g36410	0.0264362	2.09		264517_at	At1g10120	0.00339557	2.73
246962_s_at	At5g24800	0.00060558	2.09		248085_at	At5g55480	0.00570858	2.74
249073_at	At5g44020	0.00109031	2.09		248404_at	At5g51460	0.0044429	2.74
250448_at	At5g10820	0.00615142	2.09		261229_at	At1g20090	0.00197836	2.74
250645_at	At5g06700	0.00073357	2.09		246408_at	At1g57680	0.00286481	2.75
251109_at	At5g01600	0.0117354	2.09		252193_at	At3g50060	0.00197836	2.75
254893_at	At4g11830	0.00635327	2.09		253522_at	At4g31290	0.00881078	2.75
256627_at	At3g19970	0.0125891	2.09		258225_at	At3g15630	0.002379	2.75
258123_at	At3g18040	0.00507238	2.09		264321_at	At1g04200	0.012699	2.75
258684_at	At3g08680	0.0270253	2.09		256747_at	At3g29180	0.00042942	2.76
259683_at	At1g63050	0.00147706	2.09		263326_at	At2g04280	0.0048133	2.77
259721_at	At1g60890	0.00353918	2.09		264209_at	At1g22740	0.00787038	2.77
261131_at	At1g19835	0.00502508	2.09		258527_at	At3g06850	0.0286076	2.78
263386_at	At2g40150	0.00417812	2.09		264078_at	At2g28470	0.014859	2.78
266140_at	At2g28120	0.0326612	2.09		261279_at	At1g05850	0.00109607	2.79
245884_at	At5g09300	0.0043359	2.1		261926_at	At1g22530	0.00348496	2.79
249220_at	At5g42420	0.00676682	2.1		262703_at	At1g16510	0.00358875	2.79
252711_at	At3g43720	0.00039799	2.1		248943_s_at	At5g45440 At5g45490	0.00112773	2.8
264153_at	At1g65390	0.0300081	2.1		255817_at	At2g33330	0.0025139	2.8
266663_at	At2g25790	0.0322994	2.1		266500_at	At2g06925	0.0149045	2.8
249457_s_at	At1g66040 At1g66050 At5g39550	0.0071107	2.11		253373_at	At4g33150	0.0273445	2.81
252646_at	At3g44610	0.003463	2.11		257171_at	At3g23760	0.00223556	2.81
254431_at	At4g20840	0.00042706	2.11		251059_at	At5g01810	0.00207558	2.82
260352_at	At1g69295	0.00938847	2.11		254770_at	At4g13340	0.00975634	2.82
244931_at	AtMg00630	0.00339351	2.12		254794_at	At4g12970	0.00715956	2.82
245244_at	At1g44350	0.0055904	2.12		245809_at	At1g58440	0.00206246	2.83
246593_at	At5g14790	0.0469222	2.12		255012_at	At4g10030	0.00153314	2.83
250837_at	At5g04620	0.00056318	2.12		251575_at	At3g58120	0.00137635	2.85
251072_at	At5g01740	0.010694	2.12		260222_at	At1g74380	0.00793329	2.85
251326_at	At3g61590	0.0100996	2.12		252272_at	At3g49670	0.0223886	2.86
254420_at	At4g21500	0.00186586	2.12		262225_at	At1g53840	0.00155032	2.86
255536_at	At4g01575	0.00516651	2.12		249583_at	At5g37770	0.00439987	2.87
256510_at	At1g33360	0.00138905	2.12		259915_at	At1g72790	0.0144093	2.87
261492_at	At1g14290	0.00092702	2.12		263194_at	At1g36060	0.0123439	2.87
261568_at	At1g01030	0.00561312	2.12		265005_at	At1g61667	0.00880537	2.87
262360_at	At1g73080	0.00532995	2.12		265610_at	At2g25430	0.00374962	2.87
264561_at	At1g55810	0.00518135	2.12		258005_at	At3g19390	0.0495705	2.88
248006_at	At5g56250	0.00669334	2.13		263957_at	At2g35880	0.00365567	2.88
253871_at	At4g27440	0.026898	2.13		257202_at	At3g23750	0.00870646	2.89
262637_at	At1g06640	0.0006059	2.13		259788_at	At1g29670	0.00155032	2.89
246411_at	At1g57770	0.00185135	2.14		264770_at	At1g23030	0.0107711	2.89
250613_at	At5g07240	0.0022759	2.14		252866_at	At4g39840	0.0172083	2.93
252890_at	At4g39400	0.00032948	2.14		247037_at	At5g67070	0.0120385	2.95
256433_at	At3g10985	0.0237737	2.14		250613_at	At5g07240	0.00123165	2.95
257427_at	At1g79060	0.00272413	2.14		260548_at	At2g43360	0.029248	2.95
246943_at	At5g25440	0.0304445	2.15		262195_at	At1g78040	0.00088426	2.95
254284_at	At4g22910	0.00564478	2.15		266745_at	At2g02950	0.00409946	2.95
260386_at	At1g74010	0.0415154	2.15		246613_at	At5g35360	0.0003792	2.96
261273_at	At1g26650	0.00057624	2.15		251736_at	At3g56130	0.001306	2.96
267532_at	At2g42040	0.00609491	2.15		255484_at	At4g02540	0.00413311	2.96
248186_at	At5g53880	0.0209963	2.16		266533_s_at	At2g16850 At4g35100	0.00030583	2.96
251881_at	At3g54250	0.00531076	2.16		260914_at	At1g02640	0.0265841	2.97
253496_at	At4g31870	0.0402086	2.16		245479_at	At4g16140	0.00124012	2.99
261924_at	At1g22550	0.00422936	2.16		258040_at	At3g21190	0.018911	2.99
261944_at	At1g64650	0.0142933	2.16		262825_at	At1g11790	0.00073579	2.99
245915_s_at	At5g19770 At5g19780	0.00221542	2.17		263918_at	At2g36590	0.0135978	2.99
250070_at	At5g17980	0.0084215	2.17		259358_at	At1g13250	0.00808184	3
251150_at	At3g63120	0.00756522	2.17		245859_at	At5g28290	0.00452787	3.02
251519_at	At3g59400	0.00323132	2.17		262797_at	At1g20840	0.00358875	3.02
252980_at	At4g38040	0.00117795	2.17		256098_at	At1g13700	0.0427544	3.03
265120_at	At1g62640	0.00435268	2.17		246855_at	At5g26280	0.00237206	3.05
246097_at	At5g20270	0.00586979	2.18		247251_at	At5g64740	0.00193037	3.05
247880_at	At5g57780	0.0224184	2.18		250470_at	At5g10160	0.00030583	3.06
247996_at	At5g56170	0.00056414	2.18		252215_at	At3g50240	0.00466055	3.06
248506_at	At5g50370	0.0073038	2.18		254016_at	At4g26150	0.00518582	3.06
248968_at	At5g45280	0.00149588	2.18		265715_s_at	At1g13860 At2g03480	0.0205605	3.06
249895_at	At5g22500	0.00233815	2.18		266956_at	At2g34510	0.00223556	3.07
253372_at	At4g33220	0.0390998	2.18		261165_at	At1g34430	0.00078424	3.08
257171_at	At3g23760	0.00311929	2.18		262910_at	At1g59710	0.00507402	3.08
258997_at	At3g01810	0.00187437	2.18		247880_at	At5g57780	0.010382	3.09
261027_at	At1g01340	0.00153006	2.18		258750_at	At3g05910	0.00276436	3.09
262542_at	At1g34180	0.00507467	2.18		263607_at	At2g16270	0.00543695	3.09
263653_at	At1g04310	0.00261591	2.18		261717_at	At1g18400	0.0145742	3.11
264512_at	At1g09575	0.026089	2.18		259573_at	At1g20390	0.00345745	3.12
266348_at	At2g01450	0.00072333	2.18		245112_at	At2g41540	0.00510478	3.13
254418_at	At4g21480	0.00333028	2.19		246011_at	At5g08330	0.00388452	3.13
259504_at	At1g15690	0.00033157	2.19		259325_at	At3g05320	0.00237206	3.13
261496_at	At1g28360	0.00377383	2.19		245176_at	At2g47440	0.00095845	3.14
267129_at	At2g23380	0.0012705	2.19		245980_at	At5g13140	0.00527711	3.14
250550_at	At5g07870	0.00199931	2.2		255571_at	At4g01220	0.00169207	3.14
254707_at	At4g18010	0.00479589	2.2		266721_at	At2g03220	0.00300396	3.14
254827_at	At4g12650	0.00072294	2.2		249693_at	At5g35750	0.00195828	3.15
262157_at	At1g52670	0.004903	2.2		250167_at	At5g15310	0.0117647	3.15
246911_at	At5g25810	0.0128614	2.21		254333_at	At4g22753	0.00682929	3.15
248914_at	At5g45750	0.0206389	2.21		256021_at	At1g58270	0.0448247	3.15
259020_at	At3g07470	0.00051626	2.21		258356_at	At3g14340	0.00205295	3.15
260028_at	At1g29980	0.0308519	2.21		267335_s_at	At1g64760 At2g19440	0.00348496	3.15
264225_at	At1g67420	0.00233597	2.21		249361_at	At5g40540	0.0354864	3.16
264238_at	At1g54740	0.00867836	2.21		258086_at	At3g25860	0.00050676	3.17
267035_at	At2g38400	0.0393276	2.21		247183_at	At5g65440	0.00757977	3.18
245386_at	At4g14010	0.00136842	2.22		257506_at	At1g29440	0.0132545	3.18
248175_at	At5g54640	0.0020584	2.22		248427_at	At5g51750	0.00553091	3.19
250910_at	At5g03720	0.00132169	2.22		248344_at	At5g52280	0.0005106	3.21
259607_at	At1g27940	0.00422936	2.22		250358_at	At5g11740	0.00426442	3.22
262263_at	At1g70940	0.0025083	2.22		250680_at	At5g06570	0.010891	3.22
264209_at	At1g22740	0.0100228	2.22		263067_at	At2g17550	0.00184018	3.22
251413_at	At3g60320	0.00187135	2.23		262729_at	At1g75840	0.00207558	3.24
259605_at	At1g27910	0.00742264	2.23		246200_at	At4g37240	0.00151762	3.26
264318_at	At1g04220	0.0029375	2.23		247597_at	At5g60860	0.00184358	3.27
266022_at	At2g05920	0.00692863	2.23		255506_at	At4g02130	0.0234485	3.27
266117_at	At2g02170	0.0130144	2.23		246995_at	At5g67470	0.00424603	3.28
253190_at	At4g35335	0.00168256	2.24		253255_at	At4g34760	0.0289154	3.28
255885_at	At1g20330	0.00056109	2.24		257547_at	At3g13000	0.00813025	3.3
259404_at	At1g17720	0.00083523	2.24		264910_at	At1g61100	0.00654758	3.33
265070_at	At1g55510	0.0278717	2.24		265938_at	At2g19620	0.00807702	3.34
247845_at	At5g58090	0.0024375	2.25		258368_at	At3g14240	0.00072889	3.35
253856_at	At4g28100	0.00151278	2.25		261055_at	At1g01300	0.0410585	3.35
250213_at	At5g13820	0.0450237	2.26		262871_at	At1g65010	0.0203651	3.35
263128_at	At1g78600	0.00714025	2.26		248704_at	At5g48450	0.00185108	3.39
245392_at	At4g15680	0.00172402	2.27		255298_at	At4g04840	0.00553599	3.39
255483_at	At4g02500	0.00136993	2.27		260109_at	At1g63260	0.00185108	3.39
256529_at	At1g33260	0.00489453	2.27		259531_at	At1g12460	0.00046771	3.4
261756_at	At1g08315	0.0131373	2.27		262730_at	At1g16390	0.0033461	3.4
264157_at	At1g65310	0.00669334	2.27		251864_at	At3g54920	0.00085384	3.41
265610_at	At2g25430	0.00034633	2.27		260982_at	At1g53520	0.00348496	3.41
245794_at	At1g32170	0.00853015	2.28		266295_at	At2g29550	0.00982177	3.43
247974_at	At5g56780	0.00024894	2.28		260686_at	At1g17620	0.00265593	3.45
258274_at	At3g15640	0.00276714	2.28		248683_at	At5g48490	0.0359646	3.48
258421_at	At3g16690	0.00121244	2.28		249410_at	At5g40380	0.00252646	3.5
259037_at	At3g09350	0.00199931	2.28		249985_at	At5g18500	0.00158654	3.52
245600_at	At4g14230	0.00057313	2.29		252167_at	At3g50560	0.00253812	3.55
250772_at	At5g05420	0.00160879	2.29		258393_at	At3g15480	0.00095845	3.55
254367_at	At4g21700	0.00254894	2.29		246005_at	At5g08415	0.00039012	3.58
266899_at	At2g34620	0.00403583	2.29		253887_at	At4g27730	0.0181636	3.58
246592_at	At5g14890	0.00124448	2.3		245780_at	At1g45688	0.00134165	3.59
252215_at	At3g50240	0.00111482	2.3		259132_at	At3g02250	0.00839925	3.59
256160_at	At1g30120	0.00018304	2.3		265066_at	At1g03870	0.00103887	3.59
259850_at	At1g72240	0.00304766	2.3		256221_at	At1g56300	0.00282429	3.63
265879_at	At2g42450	0.00027313	2.3		252160_at	At3g50570	0.00042942	3.65
266533_s_at	At2g16850 At4g35100	0.00017147	2.3		248283_at	At5g52920	0.0001241	3.66
245799_at	At1g45616	0.00309812	2.31		254221_at	At4g23820	0.0078927	3.67
255577_at	At4g01410	0.00051353	2.31		256578_at	At3g28200	0.00164185	3.73
256162_at	At1g55390	0.00058605	2.31		259892_at	At1g72610	0.00081396	3.73
260877_at	At1g21500	0.00128288	2.31		263628_at	At2g04780	0.00158654	3.73
246011_at	At5g08330	0.00790846	2.32		247447_at	At5g62730	0.00451047	3.75
248941_s_at	At5g45460 At5g45470	0.00190461	2.32		251017_at	At5g02760	0.00413311	3.76
250892_at	At5g03760	0.00631428	2.32		249008_at	At5g44680	0.00332137	3.78
252374_at	At3g48100	0.0163554	2.32		257367_at	At2g25780	0.00348496	3.78
258484_at	At3g02580	0.00083523	2.32		247552_at	At5g60920	0.00059146	3.8
261685_at	At1g47290	0.00041397	2.32		263467_at	At2g31730	0.00666586	3.8
265884_at	At2g42320	0.00245046	2.32		265377_at	At2g05790	0.00099545	3.81
246702_at	At5g28050	0.0135763	2.33		248498_at	At5g50390	0.00132662	3.83
246987_at	At5g67300	0.00057676	2.33		250891_at	At5g04530	0.0043854	3.83
251736_at	At3g56130	0.00021475	2.33		256964_at	At3g13520	0.0003386	3.83
261266_at	At1g26770	0.0282299	2.33		264449_at	At1g27460	0.00304443	3.84
262725_at	At1g43580	0.00357085	2.33		253286_at	At4g34260	0.00515308	3.86
251922_at	At3g54030	0.0350694	2.34		256527_at	At1g66100	0.0206156	3.87
251966_at	At3g53380	0.00116882	2.34		245262_at	At4g16563	0.0102913	3.89
256940_at	At3g30720	0.0052193	2.34		253636_at	At4g30500	0.00287338	3.9
258788_at	At3g11780	0.00086986	2.34		255774_at	At1g18620	0.00138234	3.9
260731_at	At1g17500	0.0026284	2.34		254332_at	At4g22730	0.00365567	3.93
266715_at	At2g46780	0.00929769	2.34		262001_at	At1g33790	0.00475297	3.94
246511_at	At5g15490	0.00385833	2.35		267606_at	At2g26640	0.00169207	3.94
248344_at	At5g52280	0.00057313	2.35		251642_at	At3g57520	0.013834	3.95
256516_at	At1g66150	0.00023569	2.35		265400_at	At2g10940	0.00978309	3.98
247480_at	At5g62390	0.00048292	2.36		250110_at	At5g15350	0.00552535	3.99
247617_at	At5g60270	0.00403103	2.36		265771_at	At2g48030	0.00206442	4.04
248608_at	At5g49460	0.00020087	2.36		265918_at	At2g15090	0.00422763	4.08
254561_at	At4g19160	0.0207168	2.36		263319_at	At2g47160	0.00143757	4.1
263193_at	At1g36050	0.00122209	2.36		261114_at	At1g75388 At1g75390	0.00100946	4.13
247132_at	At5g66200	0.00122434	2.37		262768_at	At1g12990	0.00553599	4.14
267335_s_at	At1g64760 At2g19440	0.0119412	2.37		249063_at	At5g44110	0.00805697	4.17
245885_at	At5g09440	0.00064495	2.38		266035_at	At2g05990	0.00085384	4.18
248378_at	At5g51840	0.00027969	2.38		253754_at	At4g29020	0.00095744	4.2
249454_at	At5g39520	0.0403087	2.38		245228_at	At3g29810	0.00095888	4.25
249782_at	At5g24260	0.0033445	2.38		252924_at	At4g39070	0.00413311	4.26
256836_at	At3g22960	0.00028393	2.38		253215_at	At4g34950	0.0473567	4.26
266643_s_at	At2g29710 At2g29730	0.00039767	2.38		256848_at	At3g27960	0.00161545	4.26
251858_at	At3g54820	0.00460401	2.39		260856_at	At1g21910	0.0148714	4.26
262711_at	At1g16500	0.00380797	2.39		258528_at	At3g06770	0.00140839	4.27
247979_at	At5g56750	0.00265299	2.4		250337_at	At5g11790	0.00534813	4.3
248578_at	At5g49820	0.00018444	2.4		252997_at	At4g38400	0.0150854	4.35
250506_at	At5g09930	0.0466217	2.4		257947_at	At3g21720	0.00205482	4.36
252300_at	At3g49160	0.0321928	2.4		257204_at	At3g23805	0.00103887	4.37
258110_at	At3g14610	0.00356149	2.4		257895_at	At3g16950	0.00022067	4.37
258298_at	At3g23300	0.00187863	2.4		258170_at	At3g21600	0.00039012	4.37
267492_at	At2g30620	0.00535242	2.4		265414_at	At2g16660	0.0117625	4.39
249152_s_at	At5g43350 At5g43370	0.00145268	2.41		251105_at	At5g01730	0.00386866	4.41
250939_at	At5g03040	0.0005914	2.41		263942_at	At2g35860	0.00516743	4.42
254363_at	At4g22010	0.00522192	2.41		260876_at	At1g21460	0.00134165	4.43
266650_at	At2g25800	0.00065377	2.41		253405_at	At4g32800	0.012109	4.44
267279_at	At2g19460	0.0005343	2.41		266460_at	At2g47930	0.00795114	4.48
251346_at	At3g60980	0.00034467	2.42		267170_at	At2g37585	0.00237108	4.48
262180_at	At1g78050	0.0114398	2.42		266588_at	At2g14890	0.00402417	4.5
248080_at	At5g55380	0.00231072	2.43		258764_at	At3g10720	0.00523464	4.51
251290_at	At3g61850	0.00199829	2.43		250180_at	At5g14450	0.00344586	4.56
251494_at	At3g59350	0.00155741	2.43		261658_at	At1g50040	0.00352333	4.57
251642_at	At3g57520	0.013644	2.43		259608_at	At1g27960	0.00294102	4.59
253300_at	At4g33580	0.00034033	2.43		258075_at	At3g25900	0.0069079	4.6
253330_at	At4g33530	0.0005914	2.43		267318_at	At2g34770	0.00334306	4.62
266014_s_at	At2g07722 AtMg00170 AtMg00620	0.00228149	2.43		248179_at	At5g54380	0.00153314	4.63
266732_at	At2g03240	0.00056615	2.43		251961_at	At3g53620	0.00589821	4.65
246843_at	At5g26740	0.00159399	2.44		264704_at	At1g70090	0.0074197	4.66
253099_s_at	At4g37520 At4g37530	0.0246271	2.44		264124_at	At1g79360	0.00787038	4.7
254320_at	At4g22580	0.00540734	2.44		266165_at	At2g28190	0.00155032	4.77
254798_at	At4g13050	0.00101329	2.44		249037_at	At5g44130	0.0015075	4.79
256720_at	At2g34140	0.00052725	2.44		264822_at	At1g03457	0.001306	4.84
256964_at	At3g13520	0.00039246	2.44		251584_at	At3g58620	0.001306	4.86
259579_at	At1g28010	0.00570294	2.44		259072_at	At3g11700	0.00235675	4.87
262730_at	At1g16390	0.00540734	2.44		255080_at	At4g09030	0.00207289	4.88
245079_at	At2g23330	0.00134541	2.45		257076_at	At3g19680	0.0016466	4.9
251017_at	At5g02760	0.00190461	2.45		257912_at	At3g25500	0.00184358	4.93
252956_at	At4g38580	0.00927001	2.45		254563_at	At4g19120	0.0147954	5.03
253373_at	At4g33150	0.0244245	2.45		267035_at	At2g38400	0.00660753	5.04
261404_at	At1g18690	0.0016073	2.45		245816_at	At1g26210	0.00712534	5.05
245339_at	At4g16120	0.00061553	2.46		253925_at	At4g26690	0.00072889	5.06
247427_at	At5g62580	0.00105137	2.46		259095_at	At3g05020	0.00138234	5.06
250208_at	At5g14000	0.00040537	2.46		259958_at	At1g53730	0.00090972	5.07
252940_at	At4g39270	0.00351181	2.46		246371_at	At1g51940	0.0175135	5.08
256673_at	At3g52370	0.00777087	2.46		267524_at	At2g30600	0.0161478	5.1
257830_at	At3g26690	0.00460426	2.46		258327_at	At3g22640	0.00205482	5.12
259106_at	At3g05490	0.00082096	2.46		262980_at	At1g75680	0.00195828	5.13
262942_at	At1g79450	0.00903821	2.46		267523_at	At2g30600	0.00880085	5.14
266254_at	At2g27810	0.00046197	2.46		259729_at	At1g77640	0.0184344	5.16
266910_at	At2g45920	0.020722	2.46		247186_at	At5g65470	0.00345745	5.24
255881_at	At1g67070	0.00285686	2.47		250413_at	At5g11160	0.00102779	5.28
257456_at	At2g18120	0.00047874	2.47		266215_at	At2g06850	0.00134165	5.32
260645_at	At1g53300	0.00226886	2.47		258249_s_at	At3g15820 At3g15830	8.432e-05	5.33
245433_at	At4g17140	0.00038315	2.48		253891_at	At4g27720	0.0012743	5.34
248404_at	At5g51460	0.00134541	2.48		257071_at	At3g28180	0.00836522	5.34
252886_at	At4g39350	0.0004092	2.48		263207_at	At1g10550	0.00592753	5.36
262552_at	At1g31350	0.015793	2.48		261203_at	At1g12845	0.0001944	5.38
247214_at	At5g64850	0.0017176	2.49		264371_at	At1g12090	0.0220537	5.39
256771_at	At3g13700 At3g13710	0.00084469	2.49		250936_at	At5g03120	0.0308947	5.4
260830_at	At1g06760	0.012101	2.49		255064_at	At4g08950	0.0278302	5.51
247161_at	At5g65810	0.0170523	2.5		246516_at	At5g15740	0.00237206	5.56
253687_at	At4g29520	0.00185135	2.5		261727_at	At1g76090	0.00055207	5.59
263765_at	At2g21540	0.00154285	2.5		254815_at	At4g12420	8.432e-05	5.6
247246_at	At5g64620	0.00358783	2.51		245757_at	At1g35140	0.0491629	5.65
249093_at	At5g43880	0.000505	2.51		245233_at	At4g25580	0.00041055	5.8
254701_at	At4g18030	0.00413523	2.51		249174_at	At5g42900	0.00120415	5.82
257517_at	At3g16330	0.00780971	2.51		254001_at	At4g26260	0.00285264	5.86
266246_at	At2g27690	0.017863	2.51		247866_at	At5g57550	0.00643819	5.93
266629_at	At2g35590	0.00077686	2.51		264857_at	At1g24170	0.00092225	5.94
253768_at	At4g28550	0.00185135	2.52		247162_at	At5g65730	0.0012092	6.08
256311_at	At1g30330	0.00542974	2.52		263499_at	At2g42580	0.00223275	6.15
259530_at	At1g12450	0.000505	2.52		253829_at	At4g28040	0.00475297	6.17
254221_at	At4g23820	0.0160474	2.53		255433_at	At4g03210	0.00182257	6.2
258097_at	At3g23660	0.00170569	2.53		248921_at	At5g45950	0.00268701	6.22
266325_at	At2g46630	0.00142741	2.53		247069_at	At5g66920	0.00348496	6.23
248573_at	At5g49720	0.00025728	2.54		258054_at	At3g16240	8.432e-05	6.26
250505_at	At5g09870	0.00200331	2.54		250182_at	At5g14470	0.00176563	6.43
263591_at	At2g01910	0.00028673	2.54		249337_at	At5g41080	0.00424603	6.46
267128_at	At2g23620	0.00014848	2.54		262040_at	At1g80080	0.00015116	6.55
246650_at	At5g35160	0.00021847	2.55		263662_at	At1g04430	0.00015034	6.56
252066_at	At3g51550	0.00015816	2.55		251192_at	At3g62720	0.00252646	6.92
259325_at	At3g05320	0.018282	2.55		252563_at	At3g45970	0.0247696	7.03
267469_at	At2g30590	0.0007826	2.55		262092_at	At1g56150	0.00138234	7.03
262529_at	At1g17250	0.00484097	2.56		256452_at	At1g75240	0.00050676	7.08
262840_at	At1g14900	0.00172421	2.56		259664_at	At1g55330	0.0001241	7.19
245644_at	At1g25320	0.00064285	2.57		248460_at	At5g50915	0.00422763	7.21
255941_at	At1g20350	0.00295476	2.57		267201_at	At2g31010	0.00030583	7.32
260967_at	At1g12230	0.00066263	2.57		261728_at	At1g76160	0.00042942	7.35
264700_at	At1g70100	0.00026093	2.57		258227_at	At3g15620	0.00030583	7.4
267548_at	At2g32660	0.00519102	2.57		247189_at	At5g65390	0.00030583	7.42
255250_at	At4g05100	0.00062896	2.58		253050_at	At4g37450	0.00607087	7.57
255959_at	At1g21980	0.00070666	2.58		265116_at	At1g62480	0.00252646	7.58
259437_at	At1g01540	0.00043941	2.59		266613_at	At2g14900	0.00051986	7.64
265451_at	At2g46490	0.00039694	2.59		253811_at	At4g28190	0.00138234	7.65
267055_at	At2g38360	0.00585723	2.59		261395_at	At1g79700	0.00351507	7.73
246397_at	At1g58190	0.00596536	2.6		263421_at	At2g17230	0.00358875	7.92
249750_at	At5g24570	0.00097268	2.6		249955_at	At5g18840	0.00637289	8.88
254572_at	At4g19380	0.00114174	2.6		263431_at	At2g22170	8.537e-05	9.13
256598_at	At3g30180	0.0312751	2.6		267040_at	At2g34300	0.00268701	9.26
258796_at	At3g04630	0.00664145	2.6		253165_at	At4g35320	0.00071465	9.38
263275_at	At2g14170	0.00084469	2.6		248419_at	At5g51550	0.00138234	9.39
264078_at	At2g28470	0.023283	2.6		255177_at	At4g08040	0.00164185	9.63
251124_s_at	At5g01040 At5g01050	0.0159762	2.61		256577_at	At3g28220	0.00015116	10.39
253172_at	At4g35060	0.0007379	2.61		253571_at	At4g31000	0.00078694	10.47
256396_at	At3g06150	0.00077732	2.61		255818_at	At2g33570	0.00076351	11.57
258608_at	At3g03020	0.00048078	2.61		256275_at	At3g12110	0.00030583	11.91
246408_at	At1g57680	0.00033999	2.62		246550_at	At5g14920	8.432e-05	12.87
247049_at	At5g66440	0.000406	2.63		267260_at	At2g23130	0.00107465	13.14
252629_at	At3g44970	0.00433388	2.63		264777_at	At1g08630	0.00527711	16.53
256697_at	At3g20660	0.00343399	2.63		251438_s_at	At3g59930 At5g33355	8.432e-05	16.78
263731_at	At1g59970	0.00021847	2.63		254785_at	At4g12730	8.432e-05	17.55
247128_at	At5g66110	0.00052149	2.64		245325_at	At4g14130	0.00044389	24.38
260975_at	At1g53430	0.00164937	2.64		257203_at	At3g23730	0.00103887	28.46
266489_at	At2g35190	0.00055167	2.64		260662_at	At1g19540	8.432e-05	30.78
248085_at	At5g55480	0.00385844	2.65		260668_at	At1g19530	0.00010572	31.12
253392_at	At4g32650	0.0279072	2.65		252415_at	At3g47340	0.0113747	44.43
253428_at	At4g32410	0.00042654	2.65		246072_at	At5g20240	4.606e-05	53.05
254652_at	At4g18170	0.0311226	2.65
260548_at	At2g43360	0.0210395	2.65
245108_at	At2g41510	0.00345621	2.66
245349_at	At4g16690	0.00873062	2.66
261663_at	At1g18330	0.00481069	2.66
262225_at	At1g53840	0.00073123	2.66
266295_at	At2g29550	0.0120827	2.66
245706_at	At5g04310	0.00816225	2.67
250358_at	At5g11740	0.0052045	2.67
254274_at	At4g22770	0.00357197	2.67
260109_at	At1g63260	0.00121244	2.67
260887_at	At1g29160	0.00406314	2.67
263249_at	At2g31360	0.00043941	2.67
267038_at	At2g38480	0.00218956	2.67
249283_at	At5g41800	0.00064285	2.68
251646_at	At3g57780	0.00027909	2.68
253551_at	At4g30996	0.00075257	2.68
259104_at	At3g02170	0.00727197	2.68
251199_at	At3g62980	0.00014848	2.69
258945_at	At3g10660	0.00174492	2.69
262871_at	At1g65010	0.0270253	2.69
247491_at	At5g61880	0.00118377	2.7
267200_at	At2g31010	0.00049318	2.7
260501_at	At2g41770	0.00191838	2.71
261229_at	At1g20090	0.00022155	2.71
262084_at	At1g56080	0.00019752	2.71
264521_at	At1g10020	0.00035038	2.71
251059_at	At5g01810	0.00067551	2.72
255774_at	At1g18620	0.00118363	2.73
245789_at	At1g32090	0.00070305	2.74
260519_at	At1g51540	0.00045364	2.74
267034_at	At2g38310	0.00508254	2.74
263867_at	At2g36830	0.00170569	2.75
250219_at	At5g14180	0.00193051	2.76
255082_at	255082_at	0.00056716	2.76
258609_at	At3g02910	0.00563575	2.76
249626_at	At5g37540	0.00483252	2.77
255733_at	At1g25400	0.0266094	2.77
245110_at	At2g41550	0.00084659	2.78
258383_at	At3g15440	0.00199931	2.78
261926_at	At1g22530	0.00049318	2.78
263258_at	At1g10540	0.00084013	2.78
263067_at	At2g17550	0.0001289	2.8
266904_at	At2g34590	0.0001468	2.8
247866_at	At5g57550	0.0213709	2.81
263953_at	At2g36050	0.00597729	2.81
246302_at	At3g51860	0.00073357	2.82
246555_at	At5g15470	0.0005914	2.82
246772_at	At5g27490	0.0257589	2.82
250292_at	At5g13220	0.038504	2.82
267515_at	At2g45680	0.00089445	2.83
245176_at	At2g47440	0.00014848	2.84
260667_at	At1g19440	0.00185513	2.84
262582_at	At1g15410	0.00083715	2.84
248704_at	At5g48450	0.00400382	2.85
246005_at	At5g08415	0.00011128	2.86
261165_at	At1g34430	0.00023569	2.86
262729_at	At1g75840	0.00049318	2.86
263326_at	At2g04280	0.00228392	2.86
245504_at	At4g15660	0.0199583	2.87
246289_at	At3g56880	0.00156893	2.87
248592_at	At5g49280	0.00376613	2.87
246251_at	At4g37220	0.00469502	2.88
255012_at	At4g10030	0.00057773	2.88
261117_at	At1g75310	9.226e-05	2.88
251036_at	At5g02160	0.00048292	2.89
261975_at	At1g64640	0.00499576	2.89
262038_at	At1g35580	0.00065377	2.89
249583_at	At5g37770	0.00217622	2.9
260009_at	At1g67950	0.00283492	2.9
262315_at	At1g70990	0.00103095	2.9
250199_at	At5g14180	0.0251004	2.91
262768_at	At1g12990	0.00073357	2.91
252298_at	At3g49060	0.00064764	2.92
255817_at	At2g33330	0.0010496	2.92
258750_at	At3g05910	0.00169273	2.92
262756_at	At1g16370	0.0108074	2.92
247377_at	At5g63180	0.00335678	2.93
249693_at	At5g35750	0.00014848	2.93
257922_at	At3g23150	0.0207407	2.93
264517_at	At1g10120	0.00101569	2.93
245112_at	At2g41540	0.0015054	2.94
256458_at	At1g75220	0.00395159	2.94
258483_at	At3g02570	0.00043941	2.94
245291_at	At4g16155	0.00013101	2.95
249410_at	At5g40380	0.00064285	2.95
263989_at	At2g42880	0.00014408	2.95
245698_at	At5g04160	0.00110224	2.96
258577_at	At3g04220	0.0046966	2.96
263536_at	At2g25000	0.0215613	2.96
253156_at	At4g35730	0.00058243	2.97
251855_at	At3g54690	0.0001472	3
257690_at	At3g12830	0.00011264	3
258086_at	At3g25860	0.0001468	3
252179_at	At3g50760	0.0190046	3.01
255059_at	At4g09420	0.0112559	3.01
258134_at	At3g24530	0.00011128	3.01
262846_at	At1g14670	0.00011959	3.01
245861_at	At5g28300	0.00056615	3.02
251630_at	At3g57420	0.00024579	3.02
260536_at	At2g43400	0.00699996	3.02
263957_at	At2g35880	0.00060323	3.02
266743_at	At2g02990	0.016522	3.02
249732_at	At5g24420	0.0045738	3.03
255484_at	At4g02540	0.00039694	3.03
259358_at	At1g13250	0.00322319	3.03
245705_at	At5g04390	0.0012253	3.04
246510_at	At5g15410	0.00014213	3.04
246613_at	At5g35360	0.0001468	3.04
251770_at	At3g55970	0.0236359	3.04
258005_at	At3g19390	0.0170298	3.04
259592_at	At1g27950	0.0026885	3.04
259915_at	At1g72790	0.00030816	3.04
264321_at	At1g04200	0.00245566	3.04
259014_at	At3g07320	0.00275045	3.05
250827_at	At5g05170	0.00013879	3.07
258923_at	At3g10450	0.0043359	3.07
266316_at	At2g27080	0.00963151	3.08
250024_at	At5g18270	0.00406777	3.09
255878_at	At2g40620	0.00111199	3.09
260493_at	At2g41830	0.00015327	3.09
263456_at	At2g22125	0.00011128	3.09
263962_at	At2g36350	0.00306192	3.09
267008_at	At2g39350	0.00163071	3.1
250420_at	At5g11260	0.00073123	3.11
258470_at	At3g06035	0.00035932	3.11
248283_at	At5g52920	9.898e-05	3.12
254332_at	At4g22730	0.00341352	3.12
257367_at	At2g25780	0.00072294	3.12
254294_at	At4g23070	0.00255725	3.13
263840_at	At2g36885	0.00212608	3.13
248498_at	At5g50390	0.000406	3.14
260982_at	At1g53520	0.0027524	3.14
264082_at	At2g28570	0.00091442	3.14
245708_at	At5g04310	0.00260665	3.15
247464_at	At5g62070	0.00406314	3.15
255571_at	At4g01220	0.00072333	3.15
265400_at	At2g10940	0.020722	3.16
259132_at	At3g02250	0.00370117	3.18
262195_at	At1g78040	0.00017581	3.18
245809_at	At1g58440	0.00035355	3.19
265597_at	At2g20142	0.0101936	3.19
254333_at	At4g22753	0.00303575	3.21
260222_at	At1g74380	0.00072333	3.21
246288_at	At1g31850	0.0036132	3.22
267592_at	At2g39710	0.00075966	3.22
257202_at	At3g23750	0.0005758	3.24
256747_at	At3g29180	7.466e-05	3.25
248896_at	At5g46350	0.00315606	3.26
260646_at	At1g53340	0.00020087	3.26
261279_at	At1g05850	0.00014848	3.27
265283_at	At2g20370	0.00040537	3.28
264378_at	At2g25220	0.000505	3.29
250653_at	At5g06930	0.0002227	3.3
245323_at	At4g16500	0.00685114	3.31
251191_at	At3g62590	0.017625	3.31
261252_at	At1g05810	0.00015273	3.31
247105_at	At5g66630	0.00188474	3.33
266500_at	At2g06925	0.00492752	3.34
267497_at	At2g30540	0.00115994	3.34
247597_at	At5g60860	0.00034406	3.35
247183_at	At5g65440	0.00117914	3.37
257766_at	At3g23030	0.00011226	3.37
262694_at	At1g62790	0.00202344	3.39
258225_at	At3g15630	0.00392049	3.4
246995_at	At5g67470	0.00040753	3.41
258809_at	At3g04070	0.0459186	3.41
259892_at	At1g72610	0.00030316	3.41
257769_at	At3g23050	0.00020087	3.43
265066_at	At1g03870	0.00013948	3.43
253636_at	At4g30500	0.003675	3.44
261346_at	At1g79720	0.00054904	3.44
260656_at	At1g19380	0.0314658	3.45
265715_s_at	At1g13860 At2g03480	0.00940932	3.45
246633_at	At1g29720	0.0008419	3.46
250413_at	At5g11160	0.00083589	3.46
258676_at	At3g08600	0.00217622	3.47
248916_at	At5g45840	0.00018625	3.49
255333_at	At4g04410	0.00073123	3.49
262797_at	At1g20840	0.00067766	3.49
266792_at	At2g02860	0.00185131	3.49
248252_at	At5g53250	0.00306004	3.5
248236_at	At5g53870	0.0238862	3.51
251308_at	At3g61130	0.00014848	3.51
256865_at	At3g23820	0.00205871	3.51
257204_at	At3g23805	0.00066263	3.51
249456_at	At5g39410	0.00329429	3.52
252966_at	At4g38870	0.00034406	3.53
261688_at	At1g47380	0.00013972	3.55
245479_at	At4g16140	0.0008083	3.56
248163_at	At5g54510	0.00077042	3.57
247447_at	At5g62730	0.00534519	3.58
266119_at	At2g02100	0.0133507	3.58
254016_at	At4g26150	0.00121244	3.61
258209_at	At3g14060	0.00100629	3.61
263496_at	At2g42570	0.00034406	3.61
265918_at	At2g15090	0.0026101	3.61
247230_at	At5g65170	0.00011128	3.65
264449_at	At1g27460	0.00016598	3.66
262844_at	At1g14890	0.00014848	3.67
257173_at	At3g23810	0.00151278	3.68
251861_at	At3g54810	0.0005343	3.69
252210_at	At3g50410	0.00014848	3.69
262910_at	At1g59710	0.00062669	3.69
245980_at	At5g13140	0.00447473	3.71
258356_at	At3g14340	0.00042581	3.71
246200_at	At4g37240	0.00044911	3.72
265005_at	At1g61667	0.00158863	3.72
257547_at	At3g13000	0.00232707	3.73
247251_at	At5g64740	0.00010257	3.74
253066_at	At4g37770	0.00185513	3.74
262825_at	At1g11790	0.00029486	3.75
255506_at	At4g02130	0.00882518	3.76
245859_at	At5g28290	0.00039694	3.77
266035_at	At2g05990	0.00021847	3.79
265938_at	At2g19620	0.00131566	3.81
265377_at	At2g05790	0.00032948	3.82
255428_at	At4g03390	0.00034406	3.83
253215_at	At4g34950	0.0379018	3.84
263179_at	At1g05710	0.00016598	3.84
253255_at	At4g34760	0.0103974	3.86
266545_at	At2g35290	0.00145763	3.9
256544_at	At1g42560	0.0269038	3.91
264704_at	At1g70090	0.00413523	3.91
250470_at	At5g10160	3.437e-05	3.94
267393_at	At2g44500	0.00516616	3.94
250337_at	At5g11790	0.00136842	3.96
250891_at	At5g04530	0.00102141	3.98
267147_at	At2g38240	0.0196779	3.98
254001_at	At4g26260	0.00043941	4.01
247037_at	At5g67070	0.00219842	4.02
256340_at	At1g72070	0.0045738	4.02
256578_at	At3g28200	0.000101	4.03
261363_at	At1g41830	0.00430152	4.03
253485_at	At4g31800	0.00154741	4.04
259859_at	At1g68410	0.00449462	4.04
261114_at	At1g75388 At1g75390	0.00024658	4.05
245780_at	At1g45688	9.025e-05	4.08
265771_at	At2g48030	0.00043941	4.1
253828_at	At4g27970	0.0005758	4.11
266460_at	At2g47930	0.00329429	4.15
250663_at	At5g07110	0.000101	4.17
257895_at	At3g16950	3.437e-05	4.17
255538_at	At4g01680	0.00010735	4.19
261815_at	At1g08320	0.0005758	4.19
263319_at	At2g47160	0.00048913	4.19
251899_at	At3g54400	0.00026668	4.21
252866_at	At4g39840	0.00746864	4.21
258357_at	At3g14350	0.00011318	4.21
265111_at	At1g62510	0.00049054	4.23
246371_at	At1g51940	0.013125	4.24
251864_at	At3g54920	2.696e-05	4.24
258393_at	At3g15480	0.00020772	4.24
252167_at	At3g50560	0.00039244	4.25
256098_at	At1g13700	0.0104996	4.25
251105_at	At5g01730	0.00036422	4.26
264910_at	At1g61100	0.00020087	4.26
252193_at	At3g50060	0.0001468	4.29
263467_at	At2g31730	0.00221542	4.34
258040_at	At3g21190	0.00187228	4.36
258528_at	At3g06770	0.00032519	4.36
261639_at	At1g50010	0.00017858	4.39
255433_at	At4g03210	0.00084946	4.4
248247_at	At5g53210	0.00119333	4.41
249985_at	At5g18500	0.00016887	4.41
250936_at	At5g03120	0.0262965	4.41
267318_at	At2g34770	0.00039694	4.44
245816_at	At1g26210	0.00467138	4.48
256848_at	At3g27960	3.188e-05	4.48
245262_at	At4g16563	7.446e-05	4.49
248179_at	At5g54380	5.203e-05	4.49
263918_at	At2g36590	0.0041276	4.5
247162_at	At5g65730	0.00073357	4.55
266721_at	At2g03220	6.673e-05	4.56
249765_at	At5g24030	0.0454695	4.57
253286_at	At4g34260	0.00090485	4.6
256221_at	At1g56300	0.00019717	4.61
262703_at	At1g16510	0.00026353	4.64
259608_at	At1g27960	0.00022363	4.74
264770_at	At1g23030	0.0001468	4.74
267606_at	At2g26640	0.00035355	4.74
251584_at	At3g58620	0.00014848	4.77
247925_at	At5g57560	0.0201932	4.79
250287_at	At5g13330	0.0105223	4.81
257912_at	At3g25500	0.0002392	4.84
261055_at	At1g01300	0.0102494	4.85
266165_at	At2g28190	0.00011736	4.88
266215_at	At2g06850	0.00038105	4.9
263628_at	At2g04780	0.00039742	4.91
261717_at	At1g18400	0.00103274	4.92
265536_at	At2g15880	0.00233597	4.93
249037_at	At5g44130	0.0001468	4.96
250110_at	At5g15350	0.00073123	4.97
253925_at	At4g26690	9.025e-05	4.97
265356_at	At2g16595	0.00014711	5.01
247186_at	At5g65470	0.00038137	5.03
245306_at	At4g14690	0.0005343	5.07
248921_at	At5g45950	0.00072333	5.09
266415_at	At2g38530	0.00187228	5.11
258764_at	At3g10720	0.0013378	5.12
260914_at	At1g02640	0.003155	5.22
247552_at	At5g60920	4.691e-05	5.29
258054_at	At3g16240	2.709e-05	5.37
264124_at	At1g79360	0.00163867	5.37
266799_at	At2g22860	0.00488833	5.4
267263_at	At2g23110	0.00047049	5.4
250180_at	At5g14450	0.00020087	5.41
266588_at	At2g14890	0.00127871	5.41
264822_at	At1g03457	0.00017127	5.42
258368_at	At3g14240	2.34e-05	5.43
263207_at	At1g10550	7.364e-05	5.43
267524_at	At2g30600	0.00461819	5.43
256825_at	At3g22120	0.00156315	5.45
260686_at	At1g17620	6.028e-05	5.45
245317_at	At4g15610	0.0307454	5.48
249372_at	At5g40760	0.00018387	5.5
262047_at	At1g80160	0.0121723	5.51
252160_at	At3g50570	4.348e-05	5.55
256970_at	At3g21090	0.00055196	5.55
263499_at	At2g42580	0.0001468	5.63
264371_at	At1g12090	0.0145872	5.66
267523_at	At2g30600	0.00221922	5.71
251870_at	At3g54510	0.0121647	5.76
253829_at	At4g28040	0.00246547	5.78
255524_at	At4g02330	0.0123657	5.78
258249_s_at	At3g15820 At3g15830	2.237e-05	5.79
259072_at	At3g11700	0.00010285	5.84
258170_at	At3g21600	2.696e-05	5.96
259095_at	At3g05020	0.00029635	5.99
254770_at	At4g13340	0.00014848	6.01
262033_at	At1g37140	9.878e-05	6.02
267170_at	At2g37585	0.00028219	6.16
254815_at	At4g12420	2.013e-05	6.17
249361_at	At5g40540	0.00161738	6.18
259664_at	At1g55330	3.437e-05	6.2
261658_at	At1g50040	0.00015327	6.31
257076_at	At3g19680	5.815e-05	6.35
254931_at	At4g11460	0.00057876	6.39
259958_at	At1g53730	3.367e-05	6.39
263662_at	At1g04430	2.34e-05	6.43
248683_at	At5g48490	2.013e-05	6.46
264857_at	At1g24170	4.959e-05	6.52
254396_at	At4g21680	0.0268625	6.58
260856_at	At1g21910	0.00185722	6.64
245233_at	At4g25580	0.00017858	6.66
262980_at	At1g75680	0.00021588	6.72
257315_at	At3g30775	0.017031	6.78
259573_at	At1g20390	0.00015188	6.79
249337_at	At5g41080	0.00031074	6.83
263194_at	At1g36060	0.0006309	6.9
245757_at	At1g35140	0.0144929	6.99
261395_at	At1g79700	0.00154958	7.02
246516_at	At5g15740	0.00040537	7.04
248419_at	At5g51550	7.453e-05	7.04
259729_at	At1g77640	0.00205455	7.04
265116_at	At1g62480	0.00073259	7.04
256969_at	At3g21080	0.00575842	7.07
261727_at	At1g76090	3.437e-05	7.23
265414_at	At2g16660	0.0021019	7.23
245228_at	At3g29810	3.459e-05	7.29
265028_at	At1g24530	0.00444526	7.32
249174_at	At5g42900	0.00020087	7.47
254726_at	At4g13660	0.00522192	7.48
253891_at	At4g27720	0.00026304	7.53
247069_at	At5g66920	0.0006765	7.55
255064_at	At4g08950	0.00331349	7.79
252924_at	At4g39070	0.00013101	7.81
263421_at	At2g17230	0.00088782	7.96
250182_at	At5g14470	0.00047474	8.04
251192_at	At3g62720	0.00029333	8.11
254563_at	At4g19120	0.00083523	8.16
267201_at	At2g31010	2.227e-05	8.17
252563_at	At3g45970	0.00483835	8.19
257071_at	At3g28180	0.00014169	8.25
253628_at	At4g30280	0.0401341	8.32
266613_at	At2g14900	9.41e-05	8.32
250680_at	At5g06570	0.00011128	8.47
264296_at	At1g78720	2.013e-05	8.52
251961_at	At3g53620	0.00010285	8.64
249063_at	At5g44110	0.00011223	8.65
256452_at	At1g75240	4.959e-05	8.74
263942_at	At2g35860	0.00022363	8.79
253405_at	At4g32800	2.227e-05	8.81
255080_at	At4g09030	0.00049212	8.97
258227_at	At3g15620	3.562e-05	8.99
246099_at	At5g20230	0.0209963	9.52
260408_at	At1g69880	0.0209824	9.56
253165_at	At4g35320	0.00011128	9.71
247189_at	At5g65390	4.778e-05	9.72
253887_at	At4g27730	0.00070666	9.81
256577_at	At3g28220	4.691e-05	10.2
264524_at	At1g10070	0.0311985	10.58
261728_at	At1g76160	3.244e-05	10.76
256877_at	At3g26470	1.831e-05	10.77
263431_at	At2g22170	2.34e-05	10.88
253571_at	At4g31000	6.194e-05	11.29
253811_at	At4g28190	0.00016598	11.39
255818_at	At2g33570	0.00010285	11.51
253050_at	At4g37450	0.00064285	11.56
254042_at	At4g25810	0.0130144	11.58
256275_at	At3g12110	8.824e-05	11.94
252997_at	At4g38400	3.437e-05	12.62
262001_at	At1g33790	3.462e-05	12.67
248460_at	At5g50915	3.757e-05	13.38
264280_at	At1g61820	0.00039936	13.96
267040_at	At2g34300	0.00032116	13.99
264007_at	At2g21140	6.673e-05	14.8
258075_at	At3g25900	0.00014848	15.47
267260_at	At2g23130	0.00023668	15.92
246550_at	At5g14920	2.013e-05	20.95
264777_at	At1g08630	0.00126962	21.64
245325_at	At4g14130	2.013e-05	22.68
257203_at	At3g23730	2.013e-05	24.24
255177_at	At4g08040	2.34e-05	25.83
258327_at	At3g22640	2.237e-05	31.04
251438_s_at	At3g59930 At5g33355	2.34e-05	32.41
257947_at	At3g21720	2.013e-05	34.62
260662_at	At1g19540	2.227e-05	35.55
254785_at	At4g12730	4.38e-06	40.76
260668_at	At1g19530	3.437e-05	44.53
252415_at	At3g47340	0.00534408	46.28
246072_at	At5g20240	3.1e-07	208.72
